# Supplementary material for: Ancient Bacterial Class Alphaproteobacteria Cytochrome P450 Monooxygenases Can Be Found in Other Bacterial Species
Source: MDPI journal article supplement (doi:10.3390/ijms22115542), 2021-05-24
Supplement: s1 [file s1]

*Type of the Paper (Article)*

# **Ancient bacterial class *Alphaproteobacteria* cytochrome P450 monooxygenases can be found in other bacterial species**

**Nomfundo Nzuza <sup>1</sup>, Tiara Padayachee <sup>1</sup>, Puleng Rosinah Syed <sup>2</sup>, Justyna Dorota Kryś <sup>3</sup>, Wanping Chen <sup>4</sup>, Dominik Gront <sup>3\*</sup>, David R Nelson <sup>5\*</sup>, Khajamohiddin Syed <sup>1\*</sup>**

<sup>1</sup> Department of Biochemistry and Microbiology, Faculty of Science and Agriculture, University of Zululand, KwaDlangezwa 3886, South Africa; nomfundonzuza11@gmail.com (N.N.); tee07padayachee@gmail.com (T.P.); khajamohiddinsyed@gmail.com (K.S.)

<sup>2</sup> Department of Pharmaceutical Chemistry, College of Health Sciences, University of KwaZulu-Natal, Durban 4000, South Africa; prosinah@gmail.com (P.R.S.)

<sup>3</sup> Faculty of Chemistry, Biological and Chemical Research Center, University of Warsaw, Pasteura 1, 02-093 Warsaw, Poland; juchxd@gmail.com (J.D.K); dgront@gmail.com (D.G)

<sup>4</sup> Department of Molecular Microbiology and Genetics, University of Göttingen, 37077 Göttingen, Germany; chenwanping1@foxmail.com (W.C.)

<sup>5</sup> Department of Microbiology, Immunology and Biochemistry, University of Tennessee Health Science Center, Memphis, TN, 38163; drnelson1@gmail.com (D.N.R.)

\* Correspondence: dgront@gmail.com (D.G.), drnelson1@gmail.com (D.N.R.) and khajamohiddinsyed@gmail.com (K.S.)

Table S1. Information on Alphaproteobacterial species and their respective genera used in the study. Species abbreviations, their genome IDs (GenBank) and presence or absence of P450s in different species were also presented in the table.

| Genus             | Total no. of species | Species have P450s | Species don't have P450s | Species code | Species name                               | Genome IDs |
|-------------------|----------------------|--------------------|--------------------------|--------------|--------------------------------------------|------------|
| <i>Rickettsia</i> | 47                   | 0                  | 47                       | rpr          | <i>Rickettsia prowazekii</i> Madrid E      | AJ235269   |
|                   |                      |                    |                          | rpo          | <i>Rickettsia prowazekii</i> BuV67-CWPP    | CP003393   |
|                   |                      |                    |                          | rpw          | <i>Rickettsia prowazekii</i> Chernikova    | CP003391   |
|                   |                      |                    |                          | rpz          | <i>Rickettsia prowazekii</i> Dachau        | CP003394   |
|                   |                      |                    |                          | rpg          | <i>Rickettsia prowazekii</i> GvV257        | CP003395   |
|                   |                      |                    |                          | rps          | <i>Rickettsia prowazekii</i> Katsinyian    | CP003392   |
|                   |                      |                    |                          | rpv          | <i>Rickettsia prowazekii</i> RpGvF24       | CP003396   |
|                   |                      |                    |                          | rpq          | <i>Rickettsia prowazekii</i> Rp22          | CP001584   |
|                   |                      |                    |                          | rpl          | <i>Rickettsia prowazekii</i> Breinl        | CP004889   |
|                   |                      |                    |                          | rpn          | <i>Rickettsia prowazekii</i> NMRC Madrid E | CP004888   |
|                   |                      |                    |                          | rty          | <i>Rickettsia typhi</i> Wilmington         | AE017197   |
|                   |                      |                    |                          | rtt          | <i>Rickettsia typhi</i> TH1527             | CP003397   |
|                   |                      |                    |                          | rtb          | <i>Rickettsia typhi</i> B9991CWPP          | CP003398   |
|                   |                      |                    |                          | rcm          | <i>Rickettsia canadensis</i> McKiel        | CP000409   |
|                   |                      |                    |                          | rcc          | <i>Rickettsia canadensis</i> CA410         | CP003304   |
|                   |                      |                    |                          | rbe          | <i>Rickettsia bellii</i> RML369-C          | CP000087   |
|                   |                      |                    |                          | rbo          | <i>Rickettsia bellii</i> OSU 85-389        | CP000849   |
|                   |                      |                    |                          | rco          | <i>Rickettsia conorii</i>                  | AE006914   |
|                   |                      |                    |                          | rfe          | <i>Rickettsia felis</i>                    | CP000054   |
|                   |                      |                    |                          | rak          | <i>Rickettsia akari</i>                    | CP000847   |
|                   |                      |                    |                          | rri          | <i>Rickettsia rickettsii</i> Sheila Smith  | CP000848   |
|                   |                      |                    |                          | rrj          | <i>Rickettsia rickettsii</i> Iowa          | CP000766   |
|                   |                      |                    |                          | rra          | <i>Rickettsia rickettsii</i> Arizona       | CP003307   |

|                         |    |   |    |     |                                                          |          |
|-------------------------|----|---|----|-----|----------------------------------------------------------|----------|
|                         |    |   |    | rrc | <i>Rickettsia rickettsii</i> Colombia                    | CP003306 |
|                         |    |   |    | rrh | <i>Rickettsia rickettsii</i> Hauke                       | CP003318 |
|                         |    |   |    | rrb | <i>Rickettsia rickettsii</i> Brazil                      | CP003305 |
|                         |    |   |    | rrn | <i>Rickettsia rickettsii</i> Hino                        | CP003309 |
|                         |    |   |    | rrp | <i>Rickettsia rickettsii</i> Hlp#2                       | CP003311 |
|                         |    |   |    | rrm | <i>Rickettsia rickettsii</i> Morgan                      | CP006010 |
|                         |    |   |    | rrr | <i>Rickettsia rickettsii</i> R                           | CP006009 |
|                         |    |   |    | rms | <i>Rickettsia massiliae</i> MTU5                         | CP000684 |
|                         |    |   |    | rmi | <i>Rickettsia massiliae</i> AZT80                        | CP003319 |
|                         |    |   |    | rpk | <i>Rickettsia peacockii</i>                              | CP001227 |
|                         |    |   |    | raf | <i>Rickettsia africae</i>                                | CP001612 |
|                         |    |   |    | rhe | <i>Rickettsia heilongjiangensis</i>                      | CP002912 |
|                         |    |   |    | rja | <i>Rickettsia japonica</i>                               | AP011533 |
|                         |    |   |    | rsv | <i>Rickettsia slovaca</i> 13-B                           | CP002428 |
|                         |    |   |    | rsw | <i>Rickettsia slovaca</i> D-CWPP                         | CP003375 |
|                         |    |   |    | rph | <i>Rickettsia philipii</i>                               | CP003308 |
|                         |    |   |    | rau | <i>Rickettsia australis</i>                              | CP003338 |
|                         |    |   |    | rmo | <i>Rickettsia montanensis</i>                            | CP003340 |
|                         |    |   |    | rpp | <i>Rickettsia parkeri</i>                                | CP003341 |
|                         |    |   |    | rre | <i>Rickettsia rhipicephali</i>                           | CP003342 |
|                         |    |   |    | ram | <i>Rickettsia amblyommatis</i> GAT-30V                   | CP003334 |
|                         |    |   |    | rab | <i>Rickettsia amblyommatis</i> Ac37                      | CP012420 |
|                         |    |   |    | rmc | <i>Rickettsia monacensis</i>                             | LN794217 |
|                         |    |   |    | ric | <i>Rickettsia</i> sp. MEAM1 ( <i>Bemisia tabaci</i> )    | CP016305 |
| <i>Orientia</i>         | 2  | 0 | 2  | ots | <i>Orientia tsutsugamushi</i> Boryong                    | AM494475 |
|                         |    |   |    | ott | <i>Orientia tsutsugamushi</i> Ikeda                      | AP008981 |
| <i>Phycoreickettsia</i> | 1  | 0 | 1  | ptc | <i>Candidatus Phycoreickettsia trachydisci</i>           | CP027845 |
| <i>Wolbachia</i>        | 10 | 0 | 10 | wol | <i>Wolbachia</i> wMel ( <i>Drosophila melanogaster</i> ) | AE017196 |
|                         |    |   |    | wri | <i>Wolbachia</i> wRi ( <i>Drosophila simulans</i> )      | CP001391 |

|                  |    |   |    |      |                                                         |          |
|------------------|----|---|----|------|---------------------------------------------------------|----------|
|                  |    |   |    | wen  | <i>Wolbachia</i> wHa ( <i>Drosophila simulans</i> )     | CP003884 |
|                  |    |   |    | wed  | <i>Wolbachia</i> wNo ( <i>Drosophila simulans</i> )     | CP003883 |
|                  |    |   |    | wpi  | <i>Wolbachia</i> wPip ( <i>Culex quinquefasciatus</i> ) | AM999887 |
|                  |    |   |    | wbm  | <i>Wolbachia</i> wBm ( <i>Brugia malayi</i> )           | AE017321 |
|                  |    |   |    | woo  | <i>Wolbachia</i> wOo ( <i>Onchocerca ochengi</i> )      | HE660029 |
|                  |    |   |    | wcl  | <i>Wolbachia</i> wCle ( <i>Cimex lectularius</i> )      | AP013028 |
|                  |    |   |    | weo  | <i>Wolbachia</i> wFol ( <i>Folsomia candida</i> )       | CP015510 |
|                  |    |   |    | wpp  | <i>Wolbachia pipientis</i>                              | CP031221 |
| <i>Anaplasma</i> | 10 | 0 | 10 | ama  | <i>Anaplasma marginale</i> St. Maries                   | CP000030 |
|                  |    |   |    | amf  | <i>Anaplasma marginale</i> Florida                      | CP001079 |
|                  |    |   |    | amw  | <i>Anaplasma marginale</i> Dawn                         | CP006847 |
|                  |    |   |    | amp  | <i>Anaplasma marginale</i> Gypsy Plains                 | CP006846 |
|                  |    |   |    | acn  | <i>Anaplasma centrale</i>                               | CP001759 |
|                  |    |   |    | aph  | <i>Anaplasma phagocytophilum</i> HZ                     | CP000235 |
|                  |    |   |    | apy  | <i>Anaplasma phagocytophilum</i> HZ2                    | CP006616 |
|                  |    |   |    | apd  | <i>Anaplasma phagocytophilum</i> Dog2                   | CP006618 |
|                  |    |   |    | apha | <i>Anaplasma phagocytophilum</i> JM                     | CP006617 |
|                  |    |   |    | aoh  | <i>Anaplasma ovis</i>                                   | CP015994 |
| <i>Ehrlichia</i> | 14 | 0 | 14 | eru  | <i>Ehrlichia ruminantium</i> Welgevonden (South Africa) | CR767821 |
|                  |    |   |    | erw  | <i>Ehrlichia ruminantium</i> Welgevonden (France)       | CR925678 |
|                  |    |   |    | erg  | <i>Ehrlichia ruminantium</i> Gardel                     | CR925677 |
|                  |    |   |    | ecn  | <i>Ehrlichia canis</i>                                  | CP000107 |
|                  |    |   |    | ech  | <i>Ehrlichia chaffeensis</i> Arkansas                   | CP000236 |
|                  |    |   |    | echa | <i>Ehrlichia chaffeensis</i> Heartland                  | CP007473 |
|                  |    |   |    | echj | <i>Ehrlichia chaffeensis</i> Jax                        | CP007475 |
|                  |    |   |    | echl | <i>Ehrlichia chaffeensis</i> Liberty                    | CP007476 |
|                  |    |   |    | echs | <i>Ehrlichia chaffeensis</i> Osceola                    | CP007477 |

|                                   |   |   |   |      |                                                             |          |
|-----------------------------------|---|---|---|------|-------------------------------------------------------------|----------|
|                                   |   |   |   | echv | <i>Ehrlichia chaffeensis</i> Saint Vincent                  | CP007478 |
|                                   |   |   |   | echw | <i>Ehrlichia chaffeensis</i> Wakulla                        | CP007479 |
|                                   |   |   |   | Echp | <i>Ehrlichia chaffeensis</i> West Paces                     | CP007480 |
|                                   |   |   |   | Emr  | <i>Ehrlichia muris</i>                                      | CP006917 |
|                                   |   |   |   | Ehh  | <i>Ehrlichia</i> sp. HF                                     | CP007474 |
| <i>Neorickettsia</i>              | 3 | 0 | 3 | Nse  | <i>Neorickettsia sennetsu</i>                               | CP000237 |
|                                   |   |   |   | Nri  | <i>Neorickettsia risticii</i>                               | CP001431 |
|                                   |   |   |   | Nhm  | <i>Neorickettsia helminthoeca</i>                           | CP007481 |
| <i>Midichloria</i>                | 1 | 0 | 1 | Mmn  | <i>Candidatus Midichloria mitochondrii</i>                  | CP002130 |
| <i>Fokinia</i>                    | 1 | 0 | 1 | Fso  | <i>Candidatus Fokinia solitaria</i>                         | CP025989 |
| <i>Unclassified rickettiales</i>  | 2 | 0 | 2 | Rbt  | <i>Rickettsiales bacterium</i> Ac37b                        | CP009217 |
|                                   |   |   |   | Ren  | <i>Rickettsiales endosymbiont of Stachyamoeba lipophore</i> | CP033611 |
| <i>Paracaedibacter</i>            | 1 | 0 | 1 | Paca | <i>Candidatus Paracaedibacter acanthamoebae</i>             | CP008941 |
| <i>Paracaedimonas</i>             | 1 | 0 | 1 | Caq  | <i>Candidatus Paracaedimonas acanthamoebae</i>              | CP008936 |
| <i>Nucleicultrix</i>              | 1 | 0 | 1 | Naf  | <i>Candidatus Nucleicultrix amoebiphila</i>                 | CP008743 |
| <i>Unclassified Holosporaceae</i> | 1 | 0 | 1 | Eaa  | <i>Endosymbiont of Acanthamoeba</i> sp. UWC8                | CP004403 |
| <i>Mesorhizobium</i>              | 8 | 7 | 1 | Mlo  | <i>Mesorhizobium japonicum</i> MAFF 303099                  | BA000012 |
|                                   |   |   |   | Mln  | <i>Mesorhizobium loti</i> NZP2037                           | CP016079 |
|                                   |   |   |   | Mci  | <i>Mesorhizobium ciceri</i> (biovar <i>Biserrulae</i> )     | CP002447 |
|                                   |   |   |   | mop  | <i>Mesorhizobium opportunistum</i>                          | CP002279 |
|                                   |   |   |   | mam  | <i>Mesorhizobium australicum</i>                            | CP003358 |
|                                   |   |   |   | mamo | <i>Mesorhizobium amorphae</i>                               | CP015318 |
|                                   |   |   |   | meso | <i>Mesorhizobium</i> sp. B7                                 | CP018171 |
|                                   |   |   |   | mesw | <i>Mesorhizobium</i> sp. WSM1497                            | CP021070 |
| <i>Chelativorans</i>              | 1 | 1 | 0 | mes  | <i>Chelativorans</i> sp. BNC1                               | CP000390 |
| <i>Hoeflea</i>                    | 1 | 1 | 0 | hoe  | <i>Hoeflea</i> sp. IMCC20628                                | CP011479 |
| <i>Aminobacter</i>                | 2 | 1 | 1 | aak  | <i>Aminobacter aminovorans</i>                              | CP015005 |
|                                   |   |   |   | amih | <i>Aminobacter</i> sp. MSH1                                 | CP026265 |

|                                  |    |    |   |      |                                       |                                    |
|----------------------------------|----|----|---|------|---------------------------------------|------------------------------------|
| <i>Phyllobacterium</i>           | 1  | 0  | 1 | pht  | <i>Phyllobacterium zundukense</i>     | CP017940                           |
| <i>Parvibaculum</i>              | 1  | 1  | 0 | pla  | <i>Parvibaculum lavamentivorans</i>   | CP000774                           |
| Unclassified <i>Rhodobiaceae</i> | 1  | 0  | 1 | rbs  | <i>Rhodobiaceae bacterium</i> SMS8    | CP030277                           |
| <i>Sinorhizobium</i>             | 15 | 14 | 1 | sme  | <i>Sinorhizobium meliloti</i> 1021    | AL591688                           |
|                                  |    |    |   | smk  | <i>Sinorhizobium meliloti</i> AK83    | CP002781, CP002782,<br>CP002783    |
|                                  |    |    |   | smq  | <i>Sinorhizobium meliloti</i> BL225C  | CP002740                           |
|                                  |    |    |   | smx  | <i>Sinorhizobium meliloti</i> SM11    | CP001830                           |
|                                  |    |    |   | smi  | <i>Sinorhizobium meliloti</i> Rm41    | HE995405                           |
|                                  |    |    |   | smeg | <i>Sinorhizobium meliloti</i> GR4     | CP003933                           |
|                                  |    |    |   | smel | <i>Sinorhizobium meliloti</i> 2011    | CP004140                           |
|                                  |    |    |   | smer | <i>Sinorhizobium meliloti</i> RMO17   | CP009144                           |
|                                  |    |    |   | smd  | <i>Sinorhizobium medicae</i>          | CP000738                           |
|                                  |    |    |   | rhi  | <i>Sinorhizobium fredii</i> NGR234    | CP001389                           |
|                                  |    |    |   | sfh  | <i>Sinorhizobium fredii</i> HH103     | HE616890                           |
|                                  |    |    |   | sfd  | <i>Sinorhizobium fredii</i> USDA 257  | CP003563                           |
|                                  |    |    |   | six  | <i>Sinorhizobium</i> sp. RAC02        | CP016450                           |
|                                  |    |    |   | same | <i>Sinorhizobium Americanum</i>       | CP013107                           |
|                                  |    |    |   | sino | <i>Sinorhizobium</i> sp. CCBAU 05631  | CP023063                           |
| <i>Ensifer</i>                   | 3  | 2  | 1 | ead  | <i>Ensifer adhaerens</i> OV14         | CP007236, CP007237                 |
|                                  |    |    |   | eah  | <i>Ensifer adhaerens</i> Casida A     | CP015880                           |
|                                  |    |    |   | esj  | <i>Ensifer sojae</i>                  | CP023067                           |
| <i>Agrobacterium</i>             | 8  | 8  | 0 | atu  | <i>Agrobacterium fabrum</i>           | AE007869 (circ), AE007870<br>(lin) |
|                                  |    |    |   | ara  | <i>Agrobacterium radiobacter</i>      | CP000628, CP000629                 |
|                                  |    |    |   | atf  | <i>Agrobacterium tumefaciens</i> Ach5 | CP011246 (circ), CP011247<br>(lin) |
|                                  |    |    |   | ata  | <i>Agrobacterium tumefaciens</i> S33  | CP014259 (circ), CP014260<br>(lin) |

|                  |    |    |   |      |                                                            |                                 |
|------------------|----|----|---|------|------------------------------------------------------------|---------------------------------|
|                  |    |    |   | avi  | <i>Agrobacterium vitis</i>                                 | CP000633, CP000634              |
|                  |    |    |   | agr  | <i>Agrobacterium</i> sp. H13-3                             | CP002248 (circ), CP002249 (lin) |
|                  |    |    |   | agc  | <i>Agrobacterium</i> sp. RAC06                             | CP016499                        |
|                  |    |    |   | aro  | <i>Agrobacterium rhizogenes</i>                            | CP019701, CP019702              |
| <i>Rhizobium</i> | 21 | 18 | 3 | ret  | <i>Rhizobium etli</i> CFN 42                               | CP000133                        |
|                  |    |    |   | rec  | <i>Rhizobium etli</i> CIAT 652                             | CP001074                        |
|                  |    |    |   | rel  | <i>Rhizobium etli</i> bv. <i>mimosae</i> Mim1              | CP005950                        |
|                  |    |    |   | rep  | <i>Rhizobium etli</i> bv. <i>phaseoli</i> IE4803           | CP007641                        |
|                  |    |    |   | rei  | <i>Rhizobium</i> sp. IE4771                                | CP006986                        |
|                  |    |    |   | rle  | <i>Rhizobium leguminosarum</i> bv. <i>viciae</i> 3841      | AM236080                        |
|                  |    |    |   | rlt  | <i>Rhizobium leguminosarum</i> bv. <i>trifolii</i> WSM2304 | CP001191                        |
|                  |    |    |   | rlg  | <i>Rhizobium leguminosarum</i> bv. <i>trifolii</i> WSM1325 | CP001622                        |
|                  |    |    |   | rlb  | <i>Rhizobium leguminosarum</i> bv. <i>trifolii</i> WSM1689 | CP007045                        |
|                  |    |    |   | rlu  | <i>Rhizobium leguminosarum</i> bv. <i>trifolii</i> CB782   | CP007067                        |
|                  |    |    |   | rtr  | <i>Rhizobium tropici</i>                                   | CP004015                        |
|                  |    |    |   | rir  | <i>Rhizobium</i> sp. IRBG74                                | HG518322                        |
|                  |    |    |   | rhl  | <i>Rhizobium favelukesii</i>                               | HG916852                        |
|                  |    |    |   | rga  | <i>Rhizobium gallicum</i>                                  | CP006877                        |
|                  |    |    |   | rhn  | <i>Rhizobium</i> sp. N1341                                 | CP013505                        |
|                  |    |    |   | rpha | <i>Rhizobium phaseoli</i>                                  | CP013580                        |
|                  |    |    |   | rht  | <i>Rhizobium</i> sp. NT-26                                 | FO082820                        |
|                  |    |    |   | rhx  | <i>Rhizobium</i> sp. N731                                  | CP013601                        |
|                  |    |    |   | rhv  | <i>Rhizobium</i> sp. S41                                   | CP016320, CP016433              |
|                  |    |    |   | rhk  | <i>Rhizobium</i> sp. Kim5                                  | CP021124                        |
|                  |    |    |   | rez  | <i>Rhizobium esperanzae</i>                                | CP013500                        |

|                     |    |    |    |      |                                                                                      |                    |
|---------------------|----|----|----|------|--------------------------------------------------------------------------------------|--------------------|
| <i>Neorhizobium</i> | 4  | 2  | 2  | ngl  | <i>Neorhizobium galegae</i> bv. <i>officinalis</i> bv. <i>officinalis</i> HAMBI 1141 | HG938355           |
|                     |    |    |    | ngg  | <i>Neorhizobium galegae</i> bv. <i>orientalis</i> HAMBI 540                          | HG938353           |
|                     |    |    |    | neo  | <i>Neorhizobium</i> sp. SOG26                                                        | CP025512           |
|                     |    |    |    | nen  | <i>Neorhizobium</i> sp. NCHU2750                                                     | CP030827           |
| <i>Liberibacter</i> | 7  | 1  | 6  | las  | <i>Candidatus Liberibacter asiaticus</i> psy62                                       | CP001677           |
|                     |    |    |    | laa  | <i>Candidatus Liberibacter asiaticus</i> gxpsy                                       | CP004005           |
|                     |    |    |    | lat  | <i>Candidatus Liberibacter asiaticus</i> Ishi-1                                      | AP014595           |
|                     |    |    |    | lso  | <i>Candidatus Liberibacter solanacearum</i>                                          | CP002371           |
|                     |    |    |    | lcc  | <i>Liberibacter crescens</i>                                                         | CP003789           |
|                     |    |    |    | lar  | <i>Candidatus Liberibacter americanus</i>                                            | CP006604           |
|                     |    |    |    | lau  | <i>Candidatus Liberibacter africanus</i>                                             | CP004021           |
| <i>Shinella</i>     | 1  | 1  | 0  | shz  | <i>Shinella</i> sp. HZN7                                                             | CP015736           |
| <i>Brucella</i>     | 43 | 30 | 13 | bme  | <i>Brucella melitensis</i> bv. 1 16M                                                 | AE008917, AE008918 |
|                     |    |    |    | bmel | <i>Brucella melitensis</i> bv. 1 16M                                                 | CP007763, CP007762 |
|                     |    |    |    | bmi  | <i>Brucella melitensis</i> ATCC 23457                                                | CP001488, CP001489 |
|                     |    |    |    | bmz  | <i>Brucella melitensis</i> M28                                                       | CP002459, CP002460 |
|                     |    |    |    | bmj  | <i>Brucella melitensis</i> M5-90                                                     | CP001851, CP001852 |
|                     |    |    |    | bmw  | <i>Brucella melitensis</i> NI                                                        | CP002931, CP002932 |
|                     |    |    |    | bmee | <i>Brucella melitensis</i> bv. 3 Ether                                               | CP007760, CP007761 |
|                     |    |    |    | bmf  | <i>Brucella abortus</i> 2308                                                         | AM040264, AM040265 |
|                     |    |    |    | bmb  | <i>Brucella abortus</i> bv. 1 9-941                                                  | AE017223, AE017224 |
|                     |    |    |    | bmc  | <i>Brucella abortus</i> S19                                                          | CP000887, CP000888 |
|                     |    |    |    | baa  | <i>Brucella abortus</i> A13334                                                       | CP003176, CP003177 |
|                     |    |    |    | babo | <i>Brucella abortus</i> bv. 2 86/8/59                                                | CP007765, CP007764 |
|                     |    |    |    | babr | <i>Brucella abortus</i> bv. 6 870                                                    | CP007709, CP007710 |
|                     |    |    |    | babt | <i>Brucella abortus</i> 63 75                                                        | CP007663, CP007662 |
|                     |    |    |    | babb | <i>Brucella abortus</i> BDW                                                          | CP007681, CP007680 |



|                     |   |   |   |      |                                         |                    |
|---------------------|---|---|---|------|-----------------------------------------|--------------------|
|                     |   |   |   | babu | <i>Brucella abortus</i> bv. 9 C68       | CP007705, CP007706 |
|                     |   |   |   | babs | <i>Brucella abortus</i> BER             | CP007682, CP007683 |
|                     |   |   |   | babc | <i>Brucella abortus</i> NCTC 10505      | CP007700, CP007701 |
|                     |   |   |   | bms  | <i>Brucella suis</i> 1330               | AE014291, AE014292 |
|                     |   |   |   | bsi  | <i>Brucella suis</i> 1330               | CP002997, CP002998 |
|                     |   |   |   | bsf  | <i>Brucella suis</i> bv. 1              | CP006961, CP006962 |
|                     |   |   |   | bsui | <i>Brucella suis</i> bv. 2 Bs143CITA    | CP007695, CP007696 |
|                     |   |   |   | bsup | <i>Brucella suis</i> bv. 2 PT09143      | CP007691, CP007692 |
|                     |   |   |   | bsuv | <i>Brucella suis</i> bv. 2 PT09172      | CP007693, CP007694 |
|                     |   |   |   | bsuc | <i>Brucella suis</i> bv. 2 Bs364CITA    | CP007697, CP007698 |
|                     |   |   |   | bmt  | <i>Brucella suis</i> ATCC 23445         | CP000911, CP000912 |
|                     |   |   |   | bsz  | <i>Brucella suis</i> bv. 3              | CP007719, CP007718 |
|                     |   |   |   | bsv  | <i>Brucella suis</i> VBI22              | CP003128, CP003129 |
|                     |   |   |   | bsw  | <i>Brucella suis</i> ZW043              | CP009094, CP009095 |
|                     |   |   |   | bsg  | <i>Brucella suis</i> ZW046              | CP009096, CP009097 |
|                     |   |   |   | bov  | <i>Brucella ovis</i>                    | CP000708, CP000709 |
|                     |   |   |   | bcs  | <i>Brucella canis</i> ATCC 23365        | CP000872, CP000873 |
|                     |   |   |   | bsk  | <i>Brucella canis</i> HSK A52141        | CP003174, CP003175 |
|                     |   |   |   | bol  | <i>Brucella canis</i> Oliveri           | HG803175, HG803176 |
|                     |   |   |   | bcar | <i>Brucella canis</i> RM6/66            | CP007758, CP007759 |
|                     |   |   |   | bcas | <i>Brucella canis</i> SVA13             | CP007629, CP007630 |
|                     |   |   |   | bmr  | <i>Brucella microti</i>                 | CP001578, CP001579 |
|                     |   |   |   | bpp  | <i>Brucella pinnipedialis</i> B2/94     | CP002078, CP002079 |
|                     |   |   |   | bpv  | <i>Brucella pinnipedialis</i> 6/566     | CP007743, CP007742 |
|                     |   |   |   | bcet | <i>Brucella ceti</i> TE10759-12         | CP006896, CP006897 |
|                     |   |   |   | bcee | <i>Brucella ceti</i> TE28753-12         | CP006898, CP006899 |
|                     |   |   |   | bvl  | <i>Brucella vulpis</i>                  | LN997863, LN997864 |
|                     |   |   |   | bru  | <i>Brucella</i> sp. 2002734562          | CP016979, CP016980 |
| <i>Ochrobactrum</i> | 4 | 3 | 1 | oan  | <i>Ochrobactrum anthropi</i> ATCC 49188 | CP000758, CP000759 |

|                         |    |    |   |      |                                                         |                    |
|-------------------------|----|----|---|------|---------------------------------------------------------|--------------------|
|                         |    |    |   | oah  | <i>Ochrobactrum anthropi</i> OAB                        | CP008820, CP008819 |
|                         |    |    |   | ops  | <i>Ochrobactrum pseudogrignonense</i>                   | CP015775, CP015776 |
|                         |    |    |   | och  | <i>Ochrobactrum</i> sp. A44                             | CP022604, CP022603 |
| <i>Bradyrhizobium</i>   | 14 | 10 | 4 | bja  | <i>Bradyrhizobium diazoefficiens</i> USDA 110           | BA000040           |
|                         |    |    |   | bju  | <i>Bradyrhizobium japonicum</i> USDA 6                  | AP012206           |
|                         |    |    |   | bjp  | <i>Bradyrhizobium japonicum</i> E109                    | CP010313           |
|                         |    |    |   | bra  | <i>Bradyrhizobium</i> sp. ORS 278                       | CU234118           |
|                         |    |    |   | bbt  | <i>Bradyrhizobium</i> sp. BTAi1                         | CP000494           |
|                         |    |    |   | brs  | <i>Bradyrhizobium</i> sp. S23321                        | AP012279           |
|                         |    |    |   | aol  | <i>Bradyrhizobium oligotrophicum</i>                    | AP012603           |
|                         |    |    |   | brc  | <i>Bradyrhizobium</i> sp. CCGE-LA001                    | CP013949           |
|                         |    |    |   | brad | <i>Bradyrhizobium</i> sp. BF49                          | LN901633           |
|                         |    |    |   | bic  | <i>Bradyrhizobium icense</i>                            | CP016428           |
|                         |    |    |   | bro  | <i>Bradyrhizobium</i> sp. ORS 285                       | LT859959           |
|                         |    |    |   | brk  | <i>Bradyrhizobium</i> sp. SK17                          | CP025113           |
|                         |    |    |   | bot  | <i>Bradyrhizobium ottawaense</i>                        | CP029425           |
|                         |    |    |   | brq  | <i>Bradyrhizobium</i> sp. 2 39S1MB                      | CP029426           |
| <i>Rhodopseudomonas</i> | 7  | 7  | 0 | rpa  | <i>Rhodopseudomonas palustris</i> CGA009                | BX571963           |
|                         |    |    |   | rpb  | <i>Rhodopseudomonas palustris</i> HaA2                  | CP000250           |
|                         |    |    |   | rpc  | <i>Rhodopseudomonas palustris</i> BisB18                | CP000301           |
|                         |    |    |   | rpd  | <i>Rhodopseudomonas palustris</i> BisB5                 | CP000283           |
|                         |    |    |   | rpe  | <i>Rhodopseudomonas palustris</i> BisA53                | CP000463           |
|                         |    |    |   | rpt  | <i>Rhodopseudomonas palustris</i> TIE-1                 | CP001096           |
|                         |    |    |   | rpx  | <i>Rhodopseudomonas palustris</i> DX-1                  | CP002418           |
| <i>Nitrobacter</i>      | 2  | 2  | 0 | nwi  | <i>Nitrobacter winogradskyi</i>                         | CP000115           |
|                         |    |    |   | nha  | <i>Nitrobacter hamburgensis</i>                         | CP000319           |
| <i>Oligotropha</i>      | 3  | 0  | 3 | oca  | <i>Oligotropha carboxidovorans</i> OM5<br>(Mississippi) | CP001196           |

|                     |    |   |    |      |                                                     |          |
|---------------------|----|---|----|------|-----------------------------------------------------|----------|
|                     |    |   |    | ocg  | <i>Oligotropha carboxidovorans</i> OM5 (Goettingen) | CP002826 |
|                     |    |   |    | oco  | <i>Oligotropha carboxidovorans</i> OM4              | CP002821 |
| <i>Bosea</i>        | 4  | 2 | 2  | bop  | <i>Bosea</i> sp. PAMC 26642                         | CP014301 |
|                     |    |   |    | bos  | <i>Bosea</i> sp. RAC05                              | CP016464 |
|                     |    |   |    | bvv  | <i>Bosea vaviloviae</i>                             | CP017147 |
|                     |    |   |    | boi  | <i>Bosea</i> sp. Tri-49                             | CP017946 |
| <i>Variibacter</i>  | 1  | 0 | 1  | vgo  | <i>Variibacter gotjawalensis</i>                    | AP014946 |
| <i>Bartonella</i>   | 20 | 0 | 20 | bhe  | <i>Bartonella henselae</i> Houston-1                | BX897699 |
|                     |    |   |    | bhn  | <i>Bartonella henselae</i> BM1374163                | HG965802 |
|                     |    |   |    | bhs  | <i>Bartonella henselae</i> BM1374165                | HG969191 |
|                     |    |   |    | bqu  | <i>Bartonella quintana</i> Toulouse                 | BX897700 |
|                     |    |   |    | bqr  | <i>Bartonella quintana</i> RM-11                    | CP003784 |
|                     |    |   |    | bbk  | <i>Bartonella bacilliformis</i>                     | CP000524 |
|                     |    |   |    | btr  | <i>Bartonella tribocorum</i> CIP 105476             | AM260525 |
|                     |    |   |    | btx  | <i>Bartonella tribocorum</i> BM1374166              | HG969192 |
|                     |    |   |    | bgr  | <i>Bartonella grahamii</i>                          | CP001562 |
|                     |    |   |    | bcd  | <i>Bartonella clarridgeiae</i>                      | FN645454 |
|                     |    |   |    | baus | <i>Bartonella australis</i>                         | CP003123 |
|                     |    |   |    | bvn  | <i>Bartonella vinsonii</i>                          | CP003124 |
|                     |    |   |    | banc | <i>Bartonella ancashensis</i>                       | CP010401 |
|                     |    |   |    | bapi | <i>Bartonella apis</i>                              | CP015625 |
|                     |    |   |    | bart | <i>Bartonella</i> sp. JB15                          | CP019787 |
|                     |    |   |    | bara | <i>Bartonella</i> sp. A1379B                        | CP019780 |
|                     |    |   |    | barw | <i>Bartonella</i> sp. WD16.2                        | CP019781 |
|                     |    |   |    | barr | <i>Bartonella</i> sp. Raccoon60                     | CP019786 |
|                     |    |   |    | baro | <i>Bartonella</i> sp. 1-1C                          | CP019489 |
|                     |    |   |    | barj | <i>Bartonella</i> sp. JB63                          | CP019788 |
| <i>Xanthobacter</i> | 1  | 1 | 0  | xau  | <i>Xanthobacter autotrophicus</i>                   | CP000781 |

|                         |    |   |   |      |                                                |                    |
|-------------------------|----|---|---|------|------------------------------------------------|--------------------|
| <i>Azorhizobium</i>     | 1  | 1 | 0 | azc  | <i>Azorhizobium caulinodans</i>                | AP009384           |
| <i>Starkeya</i>         | 1  | 0 | 1 | sno  | <i>Starkeya novella</i>                        | CP002026           |
| <i>Methylobacterium</i> | 6  | 5 | 1 | mex  | <i>Methylobacterium extorquens</i> PA1         | CP000908           |
|                         |    |   |   | mea  | <i>Methylobacterium extorquens</i> AM1         | CP001510           |
|                         |    |   |   | mdi  | <i>Methylobacterium extorquens</i> DM4         | FP103042           |
|                         |    |   |   | mch  | <i>Methylobacterium extorquens</i> CM4         | CP001298           |
|                         |    |   |   | mpo  | <i>Methylobacterium populi</i>                 | CP001029           |
|                         |    |   |   | mza  | <i>Methylobacterium zatmanii</i>               | CP021054           |
| <i>Methylobacterium</i> | 11 | 6 | 5 | mrd  | <i>Methylobacterium radiotolerans</i>          | CP001001           |
|                         |    |   |   | met  | <i>Methylobacterium</i> sp. 4-46               | CP000943           |
|                         |    |   |   | mno  | <i>Methylobacterium nodulans</i>               | CP001349           |
|                         |    |   |   | mor  | <i>Methylobacterium oryzae</i>                 | CP003811           |
|                         |    |   |   | meta | <i>Methylobacterium</i> sp. AMS5               | CP006992           |
|                         |    |   |   | maqu | <i>Methylobacterium aquaticum</i>              | AP014704           |
|                         |    |   |   | mphy | <i>Methylobacterium phyllosphaerae</i>         | CP015367           |
|                         |    |   |   | mee  | <i>Methylobacterium currus</i>                 | CP028843, CP028844 |
|                         |    |   |   | metd | <i>Methylobacterium</i> sp. DM1                | CP029173           |
|                         |    |   |   | metx | <i>Methylobacterium</i> sp. XJLW               | CP016429           |
|                         |    |   |   | mets | <i>Methylobacterium</i> sp. 17SD2-17           | CP029550           |
| <i>Microvirga</i>       | 2  | 0 | 2 | moc  | <i>Microvirga ossetica</i>                     | CP016616           |
|                         |    |   |   | miv  | <i>Microvirga</i> sp. 17 mud 1-3               | CP029481           |
| <i>Beijerinckia</i>     | 1  | 1 | 0 | bid  | <i>Beijerinckia indica</i>                     | CP001016           |
| <i>Methylocella</i>     | 1  | 1 | 0 | msl  | <i>Methylocella silvestris</i>                 | CP001280           |
| <i>Chelatococcus</i>    | 2  | 0 | 2 | chel | <i>Chelatococcus</i> sp. CO-6                  | CP012398           |
|                         |    |   |   | cdq  | <i>Chelatococcus daeguensis</i>                | CP018095           |
| <i>Hyphomicrobium</i>   | 4  | 4 | 0 | hdn  | <i>Hyphomicrobium denitrificans</i> ATCC 51888 | CP002083           |
|                         |    |   |   | hdt  | <i>Hyphomicrobium denitrificans</i> 1NES1      | CP005587           |
|                         |    |   |   | hmc  | <i>Hyphomicrobium</i> sp. MC1                  | FQ859181           |
|                         |    |   |   | hni  | <i>Hyphomicrobium nitrativorans</i>            | CP006912           |

|                                 |   |   |   |      |                                                |          |
|---------------------------------|---|---|---|------|------------------------------------------------|----------|
| <i>Rhodomicrobium</i>           | 1 | 0 | 1 | rva  | <i>Rhodomicrobium vannielii</i>                | CP002292 |
| <i>Pelagibacterium</i>          | 1 | 1 | 0 | phl  | <i>Pelagibacterium halotolerans</i>            | CP003075 |
| <i>Filomicrobium</i>            | 2 | 2 | 0 | fil  | <i>Candidatus Filomicrobium marinum</i> W      | LN829118 |
|                                 |   |   |   | fiy  | <i>Candidatus Filomicrobium marinum</i> Y      | LN829119 |
| <i>Devosia</i>                  | 2 | 1 | 1 | deq  | <i>Devosia</i> sp. H5989                       | CP011300 |
|                                 |   |   |   | dei  | <i>Devosia</i> sp. I507                        | CP026747 |
| <i>Blastochloris</i>            | 2 | 0 | 2 | bvr  | <i>Blastochloris viridis</i>                   | CP012946 |
|                                 |   |   |   | blag | <i>Blastochloris</i> sp. GI                    | AP018907 |
| <i>Rhodoplanes</i>              | 1 | 1 | 0 | rhz  | <i>Rhodoplanes</i> sp. Z2-YC6860               | CP007440 |
| <i>Maritalea</i>                | 1 | 0 | 1 | mmyr | <i>Maritalea myrionectae</i>                   | CP021330 |
| <i>Methylocystis</i>            | 3 | 2 | 1 | msc  | <i>Methylocystis</i> sp. SC2                   | HE956757 |
|                                 |   |   |   | mbry | <i>Methylocystis bryophila</i>                 | CP019948 |
|                                 |   |   |   | mros | <i>Methylocystis rosea</i>                     | CP034086 |
| <i>Methylosinus</i>             | 1 | 0 | 1 | mtw  | <i>Methylosinus trichosporium</i>              | CP023737 |
| <i>Pleomorphomonas</i>          | 1 | 0 | 1 | pleo | <i>Pleomorphomonas</i> sp. SM30                | AP017626 |
| <i>Martelella</i>               | 3 | 1 | 2 | mey  | <i>Martelella endophytica</i>                  | CP010803 |
|                                 |   |   |   | maad | <i>Martelella</i> sp. AD-3                     | CP014275 |
|                                 |   |   |   | mmed | <i>Martelella mediterranea</i>                 | CP020330 |
| <i>Aureimonas</i>               | 1 | 0 | 1 | aua  | <i>Aureimonas</i> sp. AU20                     | CP006367 |
| <i>Breoghanian</i>              | 1 | 0 | 1 | brn  | <i>Breoghanian</i> sp. L-A4                    | CP031841 |
| <i>Hodgkinia</i>                | 4 | 0 | 4 | hci  | <i>Candidatus Hodgkinia cicadicola</i> Dsem    | CP001226 |
|                                 |   |   |   | hct  | <i>Candidatus Hodgkinia cicadicola</i> TETULN  | CP008699 |
|                                 |   |   |   | hcc  | <i>Candidatus Hodgkinia cicadicola</i> TETUND1 | CP007232 |
|                                 |   |   |   | hcd  | <i>Candidatus Hodgkinia cicadicola</i> TETUND2 | CP007233 |
| <i>Methyloceanibacter</i>       | 1 | 1 | 0 | mcb  | <i>Methyloceanibacter caenitepidi</i>          | AP014648 |
| <i>Tokpelaia</i>                | 1 | 0 | 1 | thd  | <i>Candidatus Tokpelaia hoelldoblerii</i>      | CP017315 |
| <i>Pseudorhodoplanes</i>        | 1 | 1 | 0 | psin | <i>Pseudorhodoplanes sinuspersici</i>          | CP021112 |
| <i>Hartmannibacter</i>          | 1 | 0 | 1 | hdi  | <i>Hartmannibacter diazotrophicus</i>          | LT960614 |
| Unclassified <i>Rhizobiales</i> | 1 | 0 | 1 | rbm  | <i>Rhizobiales bacterium</i> NRL2              | CP016093 |

|                                         |   |   |   |      |                                              |                    |
|-----------------------------------------|---|---|---|------|----------------------------------------------|--------------------|
| <i>Caulobacter</i>                      | 7 | 4 | 3 | ccr  | <i>Caulobacter vibrioides</i> CB15           | AE005673           |
|                                         |   |   |   | ccs  | <i>Caulobacter vibrioides</i> NA1000         | CP001340           |
|                                         |   |   |   | cak  | <i>Caulobacter</i> sp. K31                   | CP000927           |
|                                         |   |   |   | cse  | <i>Caulobacter segnis</i>                    | CP002008           |
|                                         |   |   |   | chq  | <i>Caulobacter henricii</i>                  | CP013002           |
|                                         |   |   |   | cmb  | <i>Caulobacter mirabilis</i>                 | CP024201           |
|                                         |   |   |   | cfh  | <i>Caulobacter flavus</i>                    | CP026100           |
| <i>Phenylobacterium</i>                 | 2 | 1 | 1 | pzu  | <i>Phenylobacterium zucineum</i>             | CP000747           |
|                                         |   |   |   | phb  | <i>Phenylobacterium</i> sp. HYN0004          | CP029479           |
| <i>Brevundimonas</i>                    | 7 | 0 | 7 | bsb  | <i>Brevundimonas subvibrioides</i>           | CP002102           |
|                                         |   |   |   | brd  | <i>Brevundimonas</i> sp. DS20                | CP012897           |
|                                         |   |   |   | bne  | <i>Brevundimonas naejangsanensis</i>         | CP015614           |
|                                         |   |   |   | brg  | <i>Brevundimonas</i> sp. GW460-12-10-14-LB2  | CP015511           |
|                                         |   |   |   | brl  | <i>Brevundimonas</i> sp. LM2                 | CP019508           |
|                                         |   |   |   | bvc  | <i>Brevundimonas vesicularis</i>             | CP022048           |
|                                         |   |   |   | bdm  | <i>Brevundimonas diminuta</i>                | CP035093           |
| <i>Asticcacaulis</i>                    | 1 | 1 | 0 | aex  | <i>Asticcacaulis excentricus</i>             | CP002395, CP002396 |
| Unclassified<br><i>Caulobacteraceae</i> | 1 | 0 | 1 | cbot | <i>Caulobacteraceae</i> bacterium OTSz_A_272 | CP013244           |
| <i>Ruegeria</i>                         | 4 | 2 | 2 | sil  | <i>Ruegeria pomeroyi</i>                     | CP000031           |
|                                         |   |   |   | sit  | <i>Ruegeria</i> sp. TM1040                   | CP000377           |
|                                         |   |   |   | rue  | <i>Ruegeria</i> sp. NKC1-1                   | CP031092           |
|                                         |   |   |   | rua  | <i>Ruegeria</i> sp. AD91A                    | CP031946           |
| <i>Epibacterium</i>                     | 1 | 0 | 1 | rmb  | <i>Epibacterium mobile</i>                   | CP015230           |
| <i>Rhodobacter</i>                      | 7 | 5 | 2 | rsp  | <i>Rhodobacter sphaeroides</i> 2.4.1         | CP000143, CP000144 |
|                                         |   |   |   | rsh  | <i>Rhodobacter sphaeroides</i> ATCC 17029    | CP000577, CP000578 |
|                                         |   |   |   | rsq  | <i>Rhodobacter sphaeroides</i> ATCC 17025    | CP000661           |
|                                         |   |   |   | rsk  | <i>Rhodobacter sphaeroides</i> KD131         | CP001150, CP001151 |
|                                         |   |   |   | rcp  | <i>Rhodobacter capsulatus</i>                | CP001312           |

|                           |    |   |   |      |                                            |                    |
|---------------------------|----|---|---|------|--------------------------------------------|--------------------|
|                           |    |   |   | rhp  | <i>Rhodobacter</i> sp. LPB0142             | CP017781           |
|                           |    |   |   | rbl  | <i>Rhodobacter blasticus</i>               | CP020470           |
| <i>Jannaschia</i>         | 1  | 1 | 0 | jan  | <i>Jannaschia</i> sp. CCS1                 | CP000264           |
| <i>Roseobacter</i>        | 2  | 2 | 0 | rde  | <i>Roseobacter denitrificans</i>           | CP000362           |
|                           |    |   |   | rli  | <i>Roseobacter litoralis</i>               | CP002623           |
| <i>Paracoccus</i>         | 10 | 3 | 7 | pde  | <i>Paracoccus denitrificans</i>            | CP000489, CP000490 |
|                           |    |   |   | pami | <i>Paracoccus aminophilus</i>              | CP006650           |
|                           |    |   |   | pye  | <i>Paracoccus yeei</i>                     | CP020442           |
|                           |    |   |   | pcon | <i>Paracoccus contaminans</i>              | CP020612           |
|                           |    |   |   | pzh  | <i>Paracoccus zhejiangensis</i>            | CP025430           |
|                           |    |   |   | paro | <i>Paracoccus</i> sp. BM15                 | CP025408           |
|                           |    |   |   | paru | <i>Paracoccus</i> sp. CBA4604              | CP025583           |
|                           |    |   |   | pamn | <i>Paracoccus aminovorans</i>              | LN832559           |
|                           |    |   |   | pmut | <i>Paracoccus mutanolyticus</i>            | CP030239           |
|                           |    |   |   | pars | <i>Paracoccus</i> sp. SC2-6                | CP030918           |
| <i>Dinoroseobacter</i>    | 1  | 1 | 0 | dsh  | <i>Dinoroseobacter shibae</i>              | CP000830           |
| <i>Ketogulonicigenium</i> | 3  | 3 | 0 | kvu  | <i>Ketogulonicigenium vulgare</i> Y25      | CP002224           |
|                           |    |   |   | kvl  | <i>Ketogulonicigenium vulgare</i> WSH-001  | CP002018           |
|                           |    |   |   | kro  | <i>Ketogulonicigenium robustum</i>         | CP019937           |
| <i>Pseudovibrio</i>       | 1  | 1 | 0 | psf  | <i>Pseudovibrio</i> sp. FO-BEG1            | CP003147           |
| <i>Phaeobacter</i>        | 6  | 4 | 2 | pga  | <i>Phaeobacter inhibens</i> DSM 17395      | CP002976           |
|                           |    |   |   | pgl  | <i>Phaeobacter inhibens</i> 2.10           | CP002972           |
|                           |    |   |   | pgd  | <i>Phaeobacter gallaeciensis</i> DSM 26640 | CP006966           |
|                           |    |   |   | php  | <i>Phaeobacter porticola</i>               | CP016364           |
|                           |    |   |   | ppic | <i>Phaeobacter piscinae</i>                | CP010681           |
|                           |    |   |   | phq  | <i>Phaeobacter</i> sp. LSS9                | CP031956           |
| <i>Octadecabacter</i>     | 3  | 2 | 1 | oat  | <i>Octadecabacter antarcticus</i>          | CP003740           |
|                           |    |   |   | oar  | <i>Octadecabacter arcticus</i>             | CP003742           |
|                           |    |   |   | otm  | <i>Octadecabacter temperatus</i>           | CP012160           |

|                            |   |   |   |      |                                           |                    |
|----------------------------|---|---|---|------|-------------------------------------------|--------------------|
| <i>Leisingera</i>          | 2 | 1 | 1 | lmd  | <i>Leisingera methylohalidivorans</i>     | CP006773           |
|                            |   |   |   | lej  | <i>Leisingera</i> sp. NJS204              | CP035417           |
| <i>Roseibacterium</i>      | 1 | 1 | 0 | red  | <i>Roseibacterium elongatum</i>           | CP004372           |
| <i>Planktomarina</i>       | 1 | 1 | 0 | ptp  | <i>Planktomarina temperata</i>            | CP003984           |
| <i>Celeribacter</i>        | 4 | 2 | 2 | cid  | <i>Celeribacter indicus</i>               | CP004393           |
|                            |   |   |   | cmar | <i>Celeribacter marinus</i>               | CP012023           |
|                            |   |   |   | ceh  | <i>Celeribacter ethanolicus</i>           | CP022196           |
|                            |   |   |   | cmag | <i>Celeribacter manganoxidans</i>         | CP021404           |
| <i>Marinovum</i>           | 1 | 1 | 0 | malg | <i>Marinovum algicola</i>                 | CP010855           |
| <i>Confluentimicrobium</i> | 1 | 1 | 0 | con  | <i>Confluentimicrobium</i> sp. EMB200-NS6 | CP010869           |
| <i>Rhodovulum</i>          | 3 | 2 | 1 | rsu  | <i>Rhodovulum sulfidophilum</i>           | AP014800           |
|                            |   |   |   | rhm  | <i>Rhodovulum</i> sp. MB263               | CP020384           |
|                            |   |   |   | rhc  | <i>Rhodovulum</i> sp. P5                  | CP015039           |
| <i>Pannonibacter</i>       | 1 | 1 | 0 | pphr | <i>Pannonibacter phragmitetus</i>         | CP013068           |
| <i>Halocynthiibacter</i>   | 1 | 0 | 1 | hat  | <i>Halocynthiibacter arcticus</i>         | CP014327           |
| <i>Labrenzia</i>           | 3 | 2 | 1 | lap  | <i>Labrenzia</i> sp. CP4                  | CP011927           |
|                            |   |   |   | lagg | <i>Labrenzia aggregata</i>                | CP019630           |
|                            |   |   |   | labr | <i>Labrenzia</i> sp. VG12                 | CP022529           |
| <i>Defluviimonas</i>       | 1 | 1 | 0 | daa  | <i>Defluviimonas alba</i>                 | CP012661           |
| <i>Yangia</i>              | 2 | 1 | 1 | yan  | <i>Yangia</i> sp. CCB-MM3                 | CP014595, CP014596 |
|                            |   |   |   | ypac | <i>Yangia pacifica</i>                    | CP022189, CP022190 |
| <i>Sulfitobacter</i>       | 5 | 1 | 4 | suam | <i>Sulfitobacter</i> sp. AM1-D1           | CP018076           |
|                            |   |   |   | spse | <i>Sulfitobacter pseudonitzschiae</i>     | CP022415           |
|                            |   |   |   | sulz | <i>Sulfitobacter</i> sp. SK012            | CP025804           |
|                            |   |   |   | suli | <i>Sulfitobacter</i> sp. JL08             | CP025815           |
|                            |   |   |   | suld | <i>Sulfitobacter</i> sp. D7               | CP020694           |
| <i>Donghicola</i>          | 1 | 0 | 1 | don  | <i>Donghicola</i> sp. JLT3646             | CP018572           |
| <i>Salipiger</i>           | 1 | 1 | 0 | tpro | <i>Salipiger profundus</i>                | CP014796           |
| <i>Tateyamaria</i>         | 1 | 1 | 0 | tom  | <i>Tateyamaria omphalii</i>               | CP019312           |



|                                         |   |   |   |      |                                                            |          |
|-----------------------------------------|---|---|---|------|------------------------------------------------------------|----------|
| <i>Pelagibaca</i>                       | 1 | 1 | 0 | paby | <i>Pelagibaca abyssi</i>                                   | CP015093 |
| <i>Thioclava</i>                        | 1 | 1 | 0 | thw  | <i>Thioclava nitratreducens</i>                            | CP019437 |
| <i>Roseovarius</i>                      | 2 | 1 | 1 | rmm  | <i>Roseovarius mucosus</i>                                 | CP020474 |
|                                         |   |   |   | rok  | <i>Roseovarius</i> sp. AK1035                              | CP030099 |
| <i>Roseitalea</i>                       | 1 | 0 | 1 | rpod | <i>Roseitalea porphyridii</i>                              | CP036532 |
| <i>Yoonia</i>                           | 1 | 1 | 0 | lvs  | <i>Yoonia vestfoldensis</i>                                | CP021431 |
| <i>Antarctobacter</i>                   | 1 | 0 | 1 | aht  | <i>Antarctobacter heliothermus</i>                         | CP022540 |
| <i>Rhodobaca</i>                        | 1 | 0 | 1 | rbg  | <i>Rhodobaca barguzinensis</i>                             | CP024899 |
| <i>Sagittula</i>                        | 1 | 0 | 1 | sagu | <i>Sagittula</i> sp. P11                                   | CP021913 |
| <i>Thalassococcus</i>                   | 2 | 0 | 2 | thas | <i>Thalassococcus</i> sp. SH-1                             | CP027665 |
|                                         |   |   |   | thaa | <i>Thalassococcus</i> sp. S3                               | CP022303 |
| <i>Gemmobacter</i>                      | 1 | 0 | 1 | geh  | <i>Gemmobacter</i> sp. HYN0069                             | CP028918 |
| <i>Tabrizicola</i>                      | 1 | 0 | 1 | taw  | <i>Tabrizicola</i> sp. K13M18                              | CP034328 |
| <i>Silicimonas</i>                      | 1 | 0 | 1 | sal  | <i>Silicimonas algicola</i>                                | CP034588 |
| <i>Sedimentitalea</i>                   | 1 | 0 | 1 | sedi | <i>Sedimentitalea</i> sp. W43                              | CP033219 |
| Unclassified<br><i>Rhodobacteraceae</i> | 1 | 0 | 1 | rbz  | <i>Rhodobacteraceae bacterium</i> G7                       | CP021114 |
| <i>Maricaulis</i>                       | 1 | 1 | 0 | mmr  | <i>Maricaulis maris</i>                                    | CP000449 |
| <i>Hyphomonas</i>                       | 1 | 1 | 0 | hne  | <i>Hyphomonas neptunium</i>                                | CP000158 |
| <i>Hirschia</i>                         | 1 | 1 | 0 | hba  | <i>Hirschia baltica</i>                                    | CP001678 |
| <i>Glycocalis</i>                       | 1 | 0 | 1 | gak  | <i>Glycocalis alkaliphilus</i>                             | CP018911 |
| <i>Hyphomonadaceae</i>                  | 1 | 1 | 0 | hbc  | <i>Hyphomonadaceae bacterium</i> UKL13-1                   | CP012156 |
| <i>Zymomonas</i>                        | 8 | 0 | 8 | zmo  | <i>Zymomonas mobilis</i> subsp. <i>mobilis</i> ZM4         | AE008692 |
|                                         |   |   |   | zmn  | <i>Zymomonas mobilis</i> subsp. <i>mobilis</i> NCIMB 11163 | CP001722 |
|                                         |   |   |   | zmm  | <i>Zymomonas mobilis</i> subsp. <i>mobilis</i> ATCC 10988  | CP002850 |
|                                         |   |   |   | zmb  | <i>Zymomonas mobilis</i> subsp. <i>mobilis</i> ATCC 29191  | CP003704 |

|                        |    |   |    |      |                                                                   |                    |
|------------------------|----|---|----|------|-------------------------------------------------------------------|--------------------|
|                        |    |   |    | zmi  | <i>Zymomonas mobilis</i> subsp. <i>mobilis</i> CP4 = NRRL B-14023 | CP006818           |
|                        |    |   |    | zmc  | <i>Zymomonas mobilis</i> subsp. <i>mobilis</i> CP4 = NRRL B-14023 | CP003715           |
|                        |    |   |    | zmr  | <i>Zymomonas mobilis</i> subsp. <i>mobilis</i> NRRL B-12526       | CP003709           |
|                        |    |   |    | zmp  | <i>Zymomonas mobilis</i> subsp. <i>pomaceae</i> ATCC 29192        | CP002865           |
| <i>Novosphingobium</i> | 7  | 3 | 4  | nar  | <i>Novosphingobium aromaticivorans</i>                            | CP000248           |
|                        |    |   |    | npp  | <i>Novosphingobium</i> sp. PP1Y                                   | FR856862           |
|                        |    |   |    | npn  | <i>Novosphingobium pentaromativorans</i>                          | CP009291           |
|                        |    |   |    | nre  | <i>Novosphingobium resinovorum</i>                                | CP017075           |
|                        |    |   |    | nov  | <i>Novosphingobium</i> sp. P6W                                    | CP030352, CP030353 |
|                        |    |   |    | not  | <i>Novosphingobium</i> sp. THN1                                   | CP028347           |
|                        |    |   |    | ntd  | <i>Novosphingobium tardaugens</i>                                 | CP034179           |
| <i>Sphingopyxis</i>    | 11 | 7 | 4  | sal  | <i>Sphingopyxis alaskensis</i>                                    | CP000356           |
|                        |    |   |    | sphk | <i>Sphingopyxis fribergensis</i>                                  | CP009122           |
|                        |    |   |    | sphp | <i>Sphingopyxis</i> sp. 113P3                                     | CP009453           |
|                        |    |   |    | smag | <i>Sphingopyxis macrogoltabida</i> EY-1                           | CP012700           |
|                        |    |   |    | smaz | <i>Sphingopyxis macrogoltabida</i> 203                            | CP009429           |
|                        |    |   |    | ster | <i>Sphingopyxis terrae</i>                                        | CP013342           |
|                        |    |   |    | sgi  | <i>Sphingopyxis granuli</i>                                       | CP012199           |
|                        |    |   |    | sphl | <i>Sphingopyxis</i> sp. LPB0140                                   | CP018154           |
|                        |    |   |    | sphq | <i>Sphingopyxis</i> sp. QXT-31                                    | CP019449           |
|                        |    |   |    | spho | <i>Sphingopyxis</i> sp. MG                                        | CP026381           |
|                        |    |   |    | sphu | Uncultured <i>Sphingopyxis</i> sp. UC10                           | LT598653           |
| <i>Sphingomonas</i>    | 17 | 3 | 14 | swi  | <i>Sphingomonas wittichii</i>                                     | CP000699           |
|                        |    |   |    | sphd | <i>Sphingomonas wittichii</i> DC-6                                | CP021181           |
|                        |    |   |    | sphm | <i>Sphingomonas</i> sp. MM-1                                      | CP004036           |

|                       |    |   |   |      |                                     |                    |
|-----------------------|----|---|---|------|-------------------------------------|--------------------|
|                       |    |   |   | stax | <i>Sphingomonas taxi</i>            | CP009571           |
|                       |    |   |   | sphi | <i>Sphingomonas</i> sp. WHSC-8      | CP010836           |
|                       |    |   |   | ssan | <i>Sphingomonas sanxanigenens</i>   | CP006644           |
|                       |    |   |   | snj  | <i>Sphingomonas</i> sp. NIC1        | CP015521           |
|                       |    |   |   | smy  | <i>Sphingomonas melonis</i>         | CP017578           |
|                       |    |   |   | span | <i>Sphingomonas panacis</i>         | CP014168           |
|                       |    |   |   | skr  | <i>Sphingomonas koreensis</i>       | CP018820           |
|                       |    |   |   | splm | <i>Sphingomonas</i> sp. LM7         | CP019511           |
|                       |    |   |   | splk | <i>Sphingomonas</i> sp. LK11        | CP013916           |
|                       |    |   |   | sphj | <i>Sphingomonas</i> sp. JJ-A5       | CP018221           |
|                       |    |   |   | spkc | <i>Sphingomonas</i> sp. KC8         | CP016306           |
|                       |    |   |   | sphe | <i>Sphingomonas</i> sp. Cra20       | CP024923           |
|                       |    |   |   | sphf | <i>Sphingomonas</i> sp. FARSPH      | CP029985           |
|                       |    |   |   | spha | <i>Sphingomonas</i> sp. YZ-8        | CP032829           |
| <i>Sphingobium</i>    | 14 | 9 | 5 | sjp  | <i>Sphingobium japonicum</i>        | AP010803, AP010804 |
|                       |    |   |   | sch  | <i>Sphingobium chlorophenolicum</i> | CP002798, CP002799 |
|                       |    |   |   | ssy  | <i>Sphingobium</i> sp. SYK-6        | AP012222, AP012223 |
|                       |    |   |   | syb  | <i>Sphingobium</i> sp. YBL2         | CP010954           |
|                       |    |   |   | sbd  | <i>Sphingobium baderi</i>           | CP013264           |
|                       |    |   |   | spmi | <i>Sphingobium</i> sp. MI1205       | CP005188, CP005189 |
|                       |    |   |   | sphb | <i>Sphingobium</i> sp. EP60837      | CP015986, CP015987 |
|                       |    |   |   | sphr | <i>Sphingobium</i> sp. RAC03        | CP016456           |
|                       |    |   |   | sinb | <i>Sphingobium indicum</i>          | CP013070           |
|                       |    |   |   | spht | <i>Sphingobium</i> sp. TKS          | CP005083, CP005084 |
|                       |    |   |   | shyd | <i>Sphingobium hydrophobicum</i>    | CP022745, CP022746 |
|                       |    |   |   | sya  | <i>Sphingobium yanoikuyae</i>       | CP023741           |
|                       |    |   |   | sclo | <i>Sphingobium cloacae</i>          | AP017655           |
|                       |    |   |   | spyg | <i>Sphingobium</i> sp. YG1          | AP018518, AP018519 |
| <i>Citromicrobium</i> | 1  | 1 | 0 | cij  | <i>Citromicrobium</i> sp. JL477     | CP011344           |

|                           |   |   |   |      |                                            |                    |
|---------------------------|---|---|---|------|--------------------------------------------|--------------------|
| <i>Sphingorhabdus</i>     | 3 | 1 | 2 | sphg | <i>Sphingorhabdus</i> sp. M41              | CP014545           |
|                           |   |   |   | sfla | <i>Sphingorhabdus flavimaris</i>           | CP022336           |
|                           |   |   |   | sphy | <i>Sphingorhabdus</i> sp. YGSMI21          | CP022548           |
| <i>Blastomonas</i>        | 2 | 1 | 1 | blas | <i>Blastomonas</i> sp. RAC04               | CP016460           |
|                           |   |   |   | bfw  | <i>Blastomonas fulva</i>                   | CP020083           |
| <i>Rhizorhabdus</i>       | 1 | 0 | 1 | rdi  | <i>Rhizorhabdus dicambivorans</i>          | CP023449           |
| <i>Sphingosinicella</i>   | 2 | 0 | 2 | smic | <i>Sphingosinicella microcystinivorans</i> | AP018711           |
|                           |   |   |   | sphs | <i>Sphingosinicella</i> sp. BN140058       | CP035501           |
| <i>Erythrobacter</i>      | 7 | 2 | 5 | eli  | <i>Erythrobacter litoralis</i> HTCC2594    | CP000157           |
|                           |   |   |   | elq  | <i>Erythrobacter litoralis</i> DSM 8509    | CP017057           |
|                           |   |   |   | ery  | <i>Erythrobacter</i> sp. s21-N3            | CP011310           |
|                           |   |   |   | egn  | <i>Erythrobacter gangjinensis</i>          | CP018097, CP018098 |
|                           |   |   |   | efv  | <i>Erythrobacter flavus</i>                | CP022528           |
|                           |   |   |   | erk  | <i>Erythrobacter</i> sp. KY5               | CP021912           |
|                           |   |   |   | err  | <i>Erythrobacter</i> sp. YH-07             | CP031357           |
| <i>Altererythrobacter</i> | 6 | 5 | 1 | aay  | <i>Altererythrobacter atlanticus</i>       | CP011452           |
|                           |   |   |   | amx  | <i>Altererythrobacter marensis</i>         | CP011805           |
|                           |   |   |   | aep  | <i>Altererythrobacter epoxidivorans</i>    | CP012669           |
|                           |   |   |   | anh  | <i>Altererythrobacter namhicola</i>        | CP016545           |
|                           |   |   |   | ado  | <i>Altererythrobacter dongtanensis</i>     | CP016591           |
|                           |   |   |   | alb  | <i>Altererythrobacter</i> sp. B11          | AP018498           |
| <i>Croceicoccus</i>       | 2 | 1 | 1 | cna  | <i>Croceicoccus naphthovorans</i>          | CP011770           |
|                           |   |   |   | cman | <i>Croceicoccus marinus</i>                | CP019602           |
| <i>Porphyrobacter</i>     | 3 | 2 | 1 | pns  | <i>Porphyrobacter neustonensis</i>         | CP016033           |
|                           |   |   |   | porl | <i>Porphyrobacter</i> sp. LM 6             | CP017113           |
|                           |   |   |   | phz  | <i>Porphyrobacter</i> HT-58-2              | CP022600           |
| <i>Gluconobacter</i>      | 4 | 0 | 4 | gox  | <i>Gluconobacter oxydans</i> 621H          | CP000009           |
|                           |   |   |   | goh  | <i>Gluconobacter oxydans</i> H24           | CP003926           |
|                           |   |   |   | goy  | <i>Gluconobacter oxydans</i> DSM 3504      | CP004373           |

|                          |    |   |    |      |                                                        |          |
|--------------------------|----|---|----|------|--------------------------------------------------------|----------|
|                          |    |   |    | gal  | <i>Gluconobacter albidus</i>                           | CP014689 |
| <i>Granulibacter</i>     | 4  | 0 | 4  | gbe  | <i>Granulibacter bethesdensis</i> CGDNIH1              | CP000394 |
|                          |    |   |    | gbh  | <i>Granulibacter bethesdensis</i> CGDNIH2              | CP003183 |
|                          |    |   |    | gbc  | <i>Granulibacter bethesdensis</i> CGDNIH3              | CP003181 |
|                          |    |   |    | gbs  | <i>Granulibacter bethesdensis</i> CGDNIH4              | CP003182 |
| <i>Acidiphilium</i>      | 2  | 0 | 2  | acr  | <i>Acidiphilium cryptum</i>                            | CP000697 |
|                          |    |   |    | amv  | <i>Acidiphilium multivorum</i>                         | AP012035 |
| <i>Gluconacetobacter</i> | 2  | 2 | 0  | gdi  | <i>Gluconacetobacter diazotrophicus</i> PA1 5 (Brazil) | AM889285 |
|                          |    |   |    | gdj  | <i>Gluconacetobacter diazotrophicus</i> PA1 5 (JGI)    | CP001189 |
| <i>Komagataeibacter</i>  | 5  | 0 | 5  | gxy  | <i>Komagataeibacter medellinensis</i>                  | AP012159 |
|                          |    |   |    | gxl  | <i>Komagataeibacter xylinus</i>                        | CP004360 |
|                          |    |   |    | kna  | <i>Komagataeibacter nataicola</i>                      | CP019875 |
|                          |    |   |    | keu  | <i>Komagataeibacter europaeus</i>                      | CP021467 |
|                          |    |   |    | ksc  | <i>Komagataeibacter saccharivorans</i>                 | CP023036 |
| <i>Acetobacter</i>       | 17 | 1 | 16 | apt  | <i>Acetobacter pasteurianus</i> IFO 3283-01            | AP011121 |
|                          |    |   |    | apw  | <i>Acetobacter pasteurianus</i> IFO 3283-01-42C        | AP011163 |
|                          |    |   |    | apf  | <i>Acetobacter pasteurianus</i> IFO 3283-03            | AP011128 |
|                          |    |   |    | apu  | <i>Acetobacter pasteurianus</i> IFO 3283-07            | AP011135 |
|                          |    |   |    | apg  | <i>Acetobacter pasteurianus</i> IFO 3283-12            | AP011170 |
|                          |    |   |    | apq  | <i>Acetobacter pasteurianus</i> IFO 3283-22            | AP011142 |
|                          |    |   |    | apx  | <i>Acetobacter pasteurianus</i> IFO 3283-26            | AP011149 |
|                          |    |   |    | apz  | <i>Acetobacter pasteurianus</i> IFO 3283-32            | AP011156 |
|                          |    |   |    | apk  | <i>Acetobacter pasteurianus</i> 386B                   | HF677570 |
|                          |    |   |    | asz  | <i>Acetobacter senegalensis</i>                        | LN606600 |
|                          |    |   |    | asv  | <i>Acetobacter oryzafermentans</i>                     | CP011120 |
|                          |    |   |    | aace | <i>Acetobacter aceti</i>                               | CP014692 |
|                          |    |   |    | aper | <i>Acetobacter persici</i>                             | CP014687 |
|                          |    |   |    | apom | <i>Acetobacter pomorum</i>                             | CP023657 |

|                           |   |   |   |      |                                                  |                                           |
|---------------------------|---|---|---|------|--------------------------------------------------|-------------------------------------------|
|                           |   |   |   | ato  | <i>Acetobacter tropicalis</i>                    | CP022699                                  |
|                           |   |   |   | aasc | <i>Acetobacter ascendens</i>                     | CP015164                                  |
|                           |   |   |   | acet | <i>Acetobacter</i> sp. JWB                       | CP030871                                  |
| <i>Asaia</i>              | 1 | 0 | 1 | abg  | <i>Asaia bogorensis</i>                          | AP014690                                  |
| <i>Kozakia</i>            | 1 | 0 | 1 | kba  | <i>Kozakia baliensis</i>                         | CP014674                                  |
| <i>Roseomonas</i>         | 2 | 0 | 2 | rgi  | <i>Roseomonas gilardii</i>                       | CP015583, CP015584                        |
|                           |   |   |   | ros  | <i>Roseomonas</i> sp. FDAARGOS_362               | CP024588                                  |
| <i>Neoasaia</i>           | 1 | 0 | 1 | nch  | <i>Neoasaia chiangmaiensis</i>                   | CP014691                                  |
| <i>Commensalibacter</i>   | 1 | 0 | 1 | coq  | <i>Commensalibacter</i> sp. AMU001               | CP033087                                  |
| <i>Rhodospirillum</i>     | 3 | 0 | 3 | rru  | <i>Rhodospirillum rubrum</i> ATCC 11170          | CP000230                                  |
|                           |   |   |   | rrf  | <i>Rhodospirillum rubrum</i> F11                 | CP003046                                  |
|                           |   |   |   | rce  | <i>Rhodospirillum centenum</i>                   | CP000613                                  |
| <i>Pararhodospirillum</i> | 1 | 0 | 1 | rpm  | <i>Pararhodospirillum photometricum</i>          | HE663493                                  |
| <i>Magnetospirillum</i>   | 5 | 1 | 4 | mag  | <i>Magnetospirillum magneticum</i>               | AP007255                                  |
|                           |   |   |   | mgv  | <i>Magnetospirillum gryphiswaldense</i> MSR-1 v2 | HG794546                                  |
|                           |   |   |   | mgry | <i>Magnetospirillum gryphiswaldense</i> MSR-1    | CP027526                                  |
|                           |   |   |   | magx | <i>Magnetospirillum</i> sp. XM-1                 | LN997848                                  |
|                           |   |   |   | magn | <i>Magnetospirillum</i> sp. ME-1                 | CP015848                                  |
| <i>Azospirillum</i>       | 9 | 3 | 6 | azl  | <i>Azospirillum</i> sp. B510                     | AP010946                                  |
|                           |   |   |   | ali  | <i>Azospirillum lipoferum</i>                    | FQ311868                                  |
|                           |   |   |   | abs  | <i>Azospirillum brasilense</i> Sp245             | HE577327                                  |
|                           |   |   |   | abq  | <i>Azospirillum brasilense</i> Az39              | CP007793                                  |
|                           |   |   |   | abf  | <i>Azospirillum brasilense</i> Sp7               | CP012914                                  |
|                           |   |   |   | ati  | <i>Azospirillum thiophilum</i>                   | CP012401, CP012402,<br>CP012403, CP012404 |
|                           |   |   |   | ahu  | <i>Azospirillum humicireducens</i>               | CP015285                                  |
|                           |   |   |   | azt  | <i>Azospirillum</i> sp. TSH58                    | CP022364                                  |
|                           |   |   |   | azm  | <i>Azospirillum</i> sp. M2T2B2                   | CP029829                                  |
| <i>Tistrella</i>          | 1 | 1 | 0 | tmo  | <i>Tistrella mobilis</i>                         | CP003236                                  |

|                                            |   |   |   |      |                                                |                                           |
|--------------------------------------------|---|---|---|------|------------------------------------------------|-------------------------------------------|
| <i>Endolissoclinum</i>                     | 2 | 0 | 2 | thal | <i>Candidatus Endolissoclinum faulkneri</i> L2 | CP003539                                  |
|                                            |   |   |   | efk  | <i>Candidatus Endolissoclinum faulkneri</i> L5 | CP006745                                  |
| <i>Thalassospira</i>                       | 3 | 0 | 3 | txi  | <i>Thalassospira xiamenensis</i>               | CP004388                                  |
|                                            |   |   |   | thac | <i>Thalassospira marina</i>                    | CP024199                                  |
|                                            |   |   |   | tii  | <i>Thalassospira indica</i>                    | CP031555                                  |
| <i>Magnetospira</i>                        | 1 | 1 | 0 | magq | <i>Magnetospira</i> sp. QH-2                   | FO538765                                  |
| <i>Haematospirillum</i>                    | 1 | 0 | 1 | hjo  | <i>Haematospirillum jordaniae</i>              | CP014525                                  |
| <i>Nitrospirillum</i>                      | 1 | 0 | 1 | nao  | <i>Nitrospirillum amazonense</i>               | CP022110, CP022111,<br>CP022112, CP022113 |
| <i>Niveispirillum</i>                      | 1 | 0 | 1 | ncb  | <i>Niveispirillum cyanobacteriorum</i>         | CP025611, CP025612                        |
| <i>Parvularcula</i>                        | 1 | 0 | 1 | pbr  | <i>Parvularcula bermudensis</i>                | CP002156                                  |
| <i>Magnetococcus</i>                       | 1 | 0 | 1 | mgm  | <i>Magnetococcus marinus</i>                   | CP000471                                  |
| <i>Pelagibacter</i>                        | 2 | 0 | 2 | pub  | <i>Candidatus Pelagibacter ubique</i>          | CP000084                                  |
|                                            |   |   |   | pel  | <i>Candidatus Pelagibacter</i> sp. IMCC9063    | CP002511                                  |
| Unclassified<br><i>Pelagibacteraceae</i>   | 2 | 0 | 2 | apc  | <i>Alpha proteobacterium</i> HIMB59            | CP003801                                  |
|                                            |   |   |   | apm  | <i>Alpha proteobacterium</i> HIMB5             | CP003809                                  |
| <i>Micavibrio</i>                          | 2 | 0 | 2 | mai  | <i>Micavibrio aeruginosavorus</i> ARL-13       | CP002382                                  |
|                                            |   |   |   | man  | <i>Micavibrio aeruginosavorus</i> EPB          | CP003538                                  |
| <i>Polymorphum</i>                         | 1 | 1 | 0 | pgv  | <i>Polymorphum gilvum</i>                      | CP002568                                  |
| <i>Phreatobacter</i>                       | 1 | 0 | 1 | phr  | <i>Phreatobacter</i> sp. S-12                  | CP027668                                  |
| <i>Puniceispirillum</i>                    | 1 | 1 | 0 | apb  | <i>Candidatus Puniceispirillum marinum</i>     | CP001751                                  |
| Unclassified<br><i>Alphaproteobacteria</i> | 1 | 0 | 1 | abaw | <i>Alphaproteobacteria bacterium</i> WS11      | CP032509                                  |
| <i>Methylovirgula</i>                      | 1 | 0 | 1 | mlg  | <i>Methylovirgula ligni</i>                    | CP025086                                  |
| <i>Haematobacter</i>                       | 1 | 0 | 1 | hml  | <i>Haematobacter massiliensis</i>              | CP035510                                  |

Table S2. Comparative analysis of P450s and those associated with secondary metabolite biosynthetic gene clusters in the bacterial class *Alphaproteobacteria*. Standard abbreviations representing type of clusters as indicated in anti-SMASH [39] were used in the Table.

| Species name                                  | Species code | No. of P450s | No. of P450 families | No. of P450 subfamilies | No. of BGCs | No. of BGCs have P450s | BGC type | No. of P450s in BGCs | P450 name |
|-----------------------------------------------|--------------|--------------|----------------------|-------------------------|-------------|------------------------|----------|----------------------|-----------|
| <i>Bradyrhizobium oligotrophicum</i>          | aol          | 17           | 12                   | 14                      | 14          | 1                      | NRPS     | 1                    | CYP108L2  |
| <i>Bradyrhizobium japonicum</i> E109          | bjp          | 16           | 13                   | 14                      | 8           |                        |          |                      |           |
| <i>Novosphingobium aromaticivorans</i>        | nar          | 16           | 11                   | 14                      | 2           | 1                      | terpene  | 1                    | CYP153C1  |
| <i>Sphingomonas wittichii</i>                 | swi          | 16           | 16                   | 16                      | 4           |                        |          |                      |           |
| <i>Bradyrhizobium diazoefficiens</i> USDA 110 | bja          | 15           | 13                   | 13                      |             |                        |          |                      |           |
| <i>Bradyrhizobium japonicum</i> USDA 6        | bju          | 12           | 10                   | 10                      | 9           |                        |          |                      |           |
| <i>Bradyrhizobium</i> sp. BF49                | brad         | 12           | 10                   | 11                      | 3           |                        |          |                      |           |
| <i>Blastomonas</i> sp. RAC04                  | blas         | 12           | 10                   | 12                      | 4           |                        |          |                      |           |
| <i>Bradyrhizobium</i> sp. ORS 278             | bra          | 11           | 10                   | 11                      | 8           |                        |          |                      |           |
| <i>Sphingopyxis macrogoltabida</i> 203        | smaz         | 11           | 8                    | 9                       | 10          | 1                      | NRPS     | 1                    | CYP1302A1 |
| <i>Sphingobium</i> sp. MI1205                 | spmi         | 11           | 10                   | 10                      | 6           |                        |          |                      |           |
| <i>Bradyrhizobium</i> sp. BTAi1               | bbt          | 10           | 10                   | 10                      | 15          |                        |          |                      |           |



|                                                  |      |    |    |    |   |   |             |   |           |
|--------------------------------------------------|------|----|----|----|---|---|-------------|---|-----------|
| <i>Bradyrhizobium</i> sp. S23321                 | brs  | 10 | 9  | 9  | 7 | 1 | hserlactone | 1 | CYP199A26 |
| <i>Rhodopseudomonas palustris</i> HaA2           | rpb  | 10 | 10 | 10 | 6 |   |             |   |           |
| <i>Parvibaculum lavamentivorans</i>              | pla  | 9  | 5  | 5  | 3 |   |             |   |           |
| <i>Sinorhizobium fredii</i> NGR234               | rhi  | 9  | 9  | 9  | 5 |   |             |   |           |
| <i>Rhizobium</i> sp. IE4771                      | rei  | 9  | 9  | 9  | 5 |   |             |   |           |
| <i>Rhodopseudomonas palustris</i> BisB5          | rpd  | 9  | 9  | 9  | 6 |   |             |   |           |
| <i>Sphingopyxis granuli</i>                      | sgi  | 9  | 6  | 9  | 6 |   |             |   |           |
| <i>Mesorhizobium opportunistum</i>               | mop  | 8  | 8  | 8  | 7 |   |             |   |           |
| <i>Rhizobium etli</i> bv. <i>mimosae</i> Mim1    | rel  | 8  | 8  | 8  | 6 |   |             |   |           |
| <i>Jannaschia</i> sp. CCS1                       | jan  | 8  | 8  | 8  | 5 |   |             |   |           |
| <i>Hyphomonas neptunium</i>                      | hne  | 8  | 6  | 6  | 3 |   |             |   |           |
| <i>Sinorhizobium americanum</i>                  | same | 7  | 7  | 7  | 6 |   |             |   |           |
| <i>Ensifer adhaerens</i> OV14                    | ead  | 7  | 6  | 6  | 8 |   |             |   |           |
| <i>Rhizobium etli</i> bv. <i>phaseoli</i> IE4803 | rep  | 7  | 7  | 7  | 4 |   |             |   |           |
| <i>Rhizobium tropici</i>                         | rtr  | 7  | 7  | 7  |   |   |             |   |           |
| <i>Rhizobium gallicum</i>                        | rga  | 7  |    |    | 6 |   |             |   |           |
| <i>Rhizobium</i> sp. N1341                       | rhn  | 7  | 6  | 6  | 6 |   |             |   |           |
| <i>Rhizobium phaseoli</i>                        | rpha | 7  | 7  | 7  | 5 |   |             |   |           |
| <i>Rhizobium</i> sp. N731                        | rhx  | 7  | 7  | 7  | 6 |   |             |   |           |

|                                                 |      |   |   |   |    |   |                                                 |   |                             |
|-------------------------------------------------|------|---|---|---|----|---|-------------------------------------------------|---|-----------------------------|
| <i>Bradyrhizobium icense</i>                    | bic  | 7 | 7 | 7 | 9  |   |                                                 |   |                             |
| <i>Rhodopseudomonas palustris</i> TIE-1         | rpt  | 7 | 7 | 7 | 6  |   |                                                 |   |                             |
| <i>Methylobacterium radiotolerans</i>           | mrd  | 7 | 6 | 6 | 9  |   |                                                 |   |                             |
| <i>Methylobacterium</i> sp. 4-46                | met  | 7 | 7 | 7 | 15 |   |                                                 |   |                             |
| <i>Methylobacterium aquaticum</i>               | maqu | 7 | 6 | 6 | 7  |   |                                                 |   |                             |
| <i>Erythrobacter litoralis</i> DSM 8509         | elq  | 7 | 7 | 7 | 2  |   |                                                 |   |                             |
| <i>Porphyrobacter</i> sp. LM 6                  | porl | 7 | 7 | 7 | 1  |   |                                                 |   |                             |
| <i>Mesorhizobium japonicum</i> MAFF 303099      | mlo  | 6 | 6 | 6 | 8  | 1 | hserlactone                                     | 1 | CYP206A1                    |
| <i>Mesorhizobium ciceri</i> (biovar Biserrulae) | mci  | 6 | 6 | 6 | 6  |   |                                                 |   |                             |
| <i>Mesorhizobium amorphae</i>                   | mamo | 6 | 6 | 6 | 7  |   |                                                 |   |                             |
| <i>Rhizobium etli</i> CIAT 652                  | rec  | 6 | 6 | 6 | 5  |   |                                                 |   |                             |
| <i>Rhodopseudomonas palustris</i> CGA009        | rpa  | 6 | 6 | 6 | 7  |   |                                                 |   |                             |
| <i>Rhodopseudomonas palustris</i> DX-1          | rpx  | 6 | 6 | 6 | 8  |   |                                                 |   |                             |
| <i>Methylobacterium nodulans</i>                | mno  | 6 | 6 | 6 | 11 |   |                                                 |   |                             |
| <i>Methylobacterium oryzae</i>                  | mor  | 6 | 4 | 4 | 10 |   |                                                 |   |                             |
| <i>Sphingobium</i> sp. YBL2                     | syb  | 6 | 5 | 6 | 5  |   |                                                 |   |                             |
| <i>Erythrobacter litoralis</i> HTCC2594         | eli  | 6 | 4 | 6 | 1  |   |                                                 |   |                             |
| <i>Sulfitobacter</i> sp. AM1-D1                 | suam | 6 | 6 | 6 | 6  | 1 | acyl_amino_acid<br>s, bacteriocin,<br>NRPS-like | 3 | CYP1326A2<br>,<br>CYP195A21 |

|                                           |      |   |   |   |    |   |         |   |                |
|-------------------------------------------|------|---|---|---|----|---|---------|---|----------------|
|                                           |      |   |   |   |    |   |         |   | CYP2334A1      |
| <i>Mesorhizobium australicum</i>          | mam  | 5 | 5 | 5 | 7  |   |         |   |                |
| <i>Sinorhizobium meliloti</i> GR4         | smeg | 5 | 4 | 4 | 4  |   |         |   |                |
| <i>Rhizobium etli</i> CFN 42              | ret  | 5 | 5 | 5 |    |   |         |   |                |
| <i>Methylobacterium extorquens</i> PA1    | mex  | 5 | 5 | 5 | 7  |   |         |   |                |
| <i>Methylobacterium extorquens</i> AM1    | mea  | 5 | 5 | 5 | 7  |   |         |   |                |
| <i>Methylobacterium extorquens</i> DM4    | mdi  | 5 | 5 | 5 | 7  |   |         |   |                |
| <i>Hyphomicrobium denitrificans</i> 1NES1 | hdt  | 5 | 5 | 5 | 3  |   |         |   |                |
| <i>Caulobacter</i> sp. K31                | cak  | 5 | 4 | 4 | 4  |   |         |   |                |
| <i>Caulobacter segnis</i>                 | cse  | 5 | 5 | 5 | 2  |   |         |   |                |
| <i>Celeribacter indicus</i>               | cid  | 5 | 4 | 4 | 6  | 1 | ectoine | 1 | CYP1101A2<br>7 |
| <i>Novosphingobium</i> sp. PP1Y           | npp  | 5 | 5 | 5 | 3  |   |         |   |                |
| <i>Novosphingobium pentaromativorans</i>  | npn  | 5 | 4 | 5 | 5  |   |         |   |                |
| <i>Sphingopyxis alaskensis</i>            | sal  | 5 | 5 | 5 | 6  |   |         |   |                |
| <i>Sphingopyxis fribergensis</i>          | sphk | 5 | 4 | 4 | 12 |   |         |   |                |
| <i>Sphingopyxis</i> sp. 113P3             | sphp | 5 | 4 | 4 |    |   |         |   |                |
| <i>Agrobacterium fabrum</i>               | atu  | 4 | 4 | 4 | 1  | 1 | terpene | 1 | CYP206A1       |
| <i>Agrobacterium tumefaciens</i> Ach5     | atf  | 4 | 4 | 4 | 1  | 1 | terpene | 1 | CYP206A4       |

|                                                |      |   |   |   |    |   |       |   |           |
|------------------------------------------------|------|---|---|---|----|---|-------|---|-----------|
| <i>Agrobacterium vitis</i>                     | avi  | 4 | 4 | 4 | 8  |   |       |   |           |
| <i>Rhizobium</i> sp. NT-26                     | rht  | 4 | 4 | 4 | 6  | 1 | NAGGN | 1 | CYP107JE1 |
| <i>Bradyrhizobium</i> sp. CCGE-LA001           | brc  | 4 | 4 | 4 | 11 |   |       |   |           |
| <i>Rhodopseudomonas palustris</i> BisA53       | rpe  | 4 | 4 | 4 | 6  |   |       |   |           |
| <i>Methylobacterium extorquens</i> CM4         | mch  | 4 | 4 | 4 | 7  |   |       |   |           |
| <i>Methylobacterium populi</i>                 | mpo  | 4 | 3 | 3 | 7  |   |       |   |           |
| <i>Hyphomicrobium denitrificans</i> ATCC 51888 | hdn  | 4 | 4 | 4 | 4  |   |       |   |           |
| <i>Caulobacter vibrioides</i> CB15             | ccr  | 4 | 4 | 4 | 4  |   |       |   |           |
| <i>Caulobacter vibrioides</i> NA1000           | ccs  | 4 | 4 | 4 | 4  |   |       |   |           |
| <i>Ruegeria pomeroyi</i>                       | sil  | 4 | 4 | 4 | 6  |   |       |   |           |
| <i>Leisingera methylohalidivorans</i>          | lmd  | 4 | 4 | 4 | 9  |   |       |   |           |
| <i>Marinovum algicola</i>                      | malg | 4 | 4 | 4 | 5  |   |       |   |           |
| <i>Confluentimicrobium</i> sp. EMB200-NS6      | con  | 4 | 4 | 4 | 5  |   |       |   |           |
| <i>Salipiger profundus</i>                     | tpro | 4 | 3 | 3 | 5  |   |       |   |           |
| <i>Pelagibaca abyssi</i>                       | paby | 4 | 4 | 4 | 6  |   |       |   |           |
| <i>Sphingomonas</i> sp. MM-1                   | sphm | 4 | 3 | 3 | 4  |   |       |   |           |
| <i>Sphingobium chlorophenolicum</i>            | sch  | 4 | 4 | 4 | 6  |   |       |   |           |
| <i>Sphingobium</i> sp. RAC03                   | sphr | 4 | 3 | 3 | 5  |   |       |   |           |
| <i>Citromicrobium</i> sp. JL477                | cij  | 4 | 4 | 4 | 2  |   |       |   |           |

|                                                     |      |   |   |   |    |   |         |   |          |
|-----------------------------------------------------|------|---|---|---|----|---|---------|---|----------|
| <i>Altererythrobacter epoxidivorans</i>             | aep  | 4 | 4 | 4 | 1  |   |         |   |          |
| <i>Azospirillum</i> sp. B510                        | azl  | 4 | 4 | 4 | 2  |   |         |   |          |
| <i>Tistrella mobilis</i>                            | tmo  | 4 | 4 | 4 | 11 |   |         |   |          |
| <i>Hirschia baltica</i>                             | hba  | 3 | 3 | 3 | 3  |   |         |   |          |
| <i>Mesorhizobium</i> sp. B7                         | meso | 3 | 3 | 3 | 5  |   |         |   |          |
| <i>Hoeflea</i> sp. IMCC20628                        | hoe  | 3 | 3 | 3 | 5  |   |         |   |          |
| <i>Sinorhizobium meliloti</i> SM11                  | smx  | 3 | 3 | 3 | 5  |   |         |   |          |
| <i>Sinorhizobium fredii</i> USDA 257                | sfd  | 3 | 3 | 3 | 8  |   |         |   |          |
| <i>Agrobacterium radiobacter</i>                    | ara  | 3 | 3 | 3 | 3  |   |         |   |          |
| <i>Rhizobium leguminosarum</i> bv. trifolii WSM2304 | rlt  | 3 | 3 | 3 | 4  |   |         |   |          |
| <i>Rhizobium leguminosarum</i> bv. trifolii WSM1689 | rlb  | 3 | 3 | 3 | 5  |   |         |   |          |
| <i>Rhizobium</i> sp. IRBG74                         | rir  | 3 | 3 | 3 | 1  | 1 | terpene | 1 | CYP206A3 |
| <i>Rhodopseudomonas palustris</i> BisB18            | rpc  | 3 | 3 | 3 | 8  |   |         |   |          |
| <i>Methylobacterium</i> sp. AMS5                    | meta | 3 | 3 | 3 | 7  |   |         |   |          |
| <i>Hyphomicrobium</i> sp. MC1                       | hmc  | 3 | 3 | 3 | 4  |   |         |   |          |
| <i>Candidatus Filomicrobium marinum</i> W           | fil  | 3 | 3 | 3 | 3  |   |         |   |          |
| <i>Candidatus Filomicrobium marinum</i> Y           | fiy  | 3 | 3 | 3 | 3  |   |         |   |          |
| <i>Rhodoplanes</i> sp. Z2-YC6860                    | rhz  | 3 | 3 | 3 | 7  |   |         |   |          |
| <i>Phenyllobacterium zucineum</i>                   | pzu  | 3 | 3 | 3 | 3  |   |         |   |          |

|                                                                                      |     |   |   |   |   |   |         |   |           |
|--------------------------------------------------------------------------------------|-----|---|---|---|---|---|---------|---|-----------|
| <i>Ruegeria</i> sp. TM1040                                                           | sit | 3 | 3 | 3 | 5 |   |         |   |           |
| <i>Rhodobacter capsulatus</i>                                                        | rcp | 3 | 2 | 2 | 3 |   |         |   |           |
| <i>Roseobacter denitrificans</i>                                                     | rde | 3 | 3 | 3 | 6 |   |         |   |           |
| <i>Roseobacter litoralis</i>                                                         | rli | 3 | 3 | 3 | 7 |   |         |   |           |
| <i>Pseudovibrio</i> sp. FO-BEG1                                                      | psf | 3 | 3 | 3 | 6 |   |         |   |           |
| <i>Phaeobacter inhibens</i> DSM 17395                                                | pga | 3 | 3 | 3 | 6 |   |         |   |           |
| <i>Phaeobacter inhibens</i> 2.10                                                     | pgl | 3 | 3 | 3 | 6 |   |         |   |           |
| <i>Phaeobacter gallaeciensis</i> DSM 26640                                           | pgd | 3 | 3 | 3 | 5 |   |         |   |           |
| <i>Phaeobacter porticola</i>                                                         | php | 3 | 3 | 3 | 4 |   |         |   |           |
| <i>Planktomarina temperata</i>                                                       | ptp | 3 | 3 | 3 | 1 |   |         |   |           |
| <i>Labrenzia</i> sp. CP4                                                             | lap | 3 | 3 | 3 | 7 |   |         |   |           |
| <i>Defluviimonas alba</i>                                                            | daa | 3 | 3 | 3 | 3 |   |         |   |           |
| <i>Hyphomonadaceae bacterium</i> UKL13-1                                             | hbc | 3 | 3 | 3 | 2 | 1 | terpene | 1 | CYP1246A4 |
| <i>Sphingobium japonicum</i>                                                         | sjp | 3 | 3 | 3 | 7 |   |         |   |           |
| <i>Altererythrobacter atlanticus</i>                                                 | aay | 3 | 3 | 3 | 2 |   |         |   |           |
| <i>Polymorphum gilvum</i>                                                            | pgv | 3 | 3 | 3 | 8 |   |         |   |           |
| <i>Agrobacterium rhizogenes</i>                                                      | aro | 3 | 3 | 3 | 3 | 1 | terpene | 1 | CYP206A2  |
| <i>Neorhizobium galegae</i> bv. <i>officinalis</i> bv. <i>officinalis</i> HAMBI 1141 | ngl | 3 | 3 | 3 | 3 |   |         |   |           |

|                                                             |      |   |   |   |   |   |         |   |          |
|-------------------------------------------------------------|------|---|---|---|---|---|---------|---|----------|
| <i>Paracoccus yeei</i>                                      | pye  | 3 | 3 | 3 | 5 |   |         |   |          |
| <i>Mesorhizobium loti</i> NZP2037                           | mln  | 2 | 2 | 2 | 8 |   |         |   |          |
| <i>Chelativorans</i> sp. BNC1                               | mes  | 2 | 2 | 2 | 4 |   |         |   |          |
| <i>Sinorhizobium meliloti</i> 1021                          | sme  | 2 | 2 | 2 | 4 |   |         |   |          |
| <i>Sinorhizobium meliloti</i> AK83                          | smk  | 2 | 2 | 2 | 9 |   |         |   |          |
| <i>Sinorhizobium meliloti</i> BL225C                        | smq  | 2 | 2 | 2 | 4 |   |         |   |          |
| <i>Sinorhizobium meliloti</i> Rm41                          | smi  | 2 | 2 | 2 | 4 |   |         |   |          |
| <i>Sinorhizobium meliloti</i> 2011                          | smel | 2 | 2 | 2 | 4 |   |         |   |          |
| <i>Sinorhizobium meliloti</i> RMO17                         | smer | 2 | 2 | 2 | 4 |   |         |   |          |
| <i>Sinorhizobium medicae</i>                                | smd  | 2 | 2 | 2 | 5 |   |         |   |          |
| <i>Sinorhizobium fredii</i> HH103                           | sfh  | 2 | 2 | 2 | 7 |   |         |   |          |
| <i>Sinorhizobium</i> sp. RAC02                              | six  | 2 | 2 | 2 | 1 |   |         |   |          |
| <i>Ensifer adhaerens</i> Casida A                           | eah  | 2 | 2 | 2 |   |   |         |   |          |
| <i>Agrobacterium</i> sp. H13-3                              | agr  | 2 | 2 | 2 | 1 | 1 | terpene | 1 | CYP206A4 |
| <i>Agrobacterium</i> sp. RAC06                              | agc  | 2 | 2 | 2 | 8 |   |         |   |          |
| <i>Rhizobium leguminosarum</i> bv. viciae 3841              | rle  | 2 | 2 | 2 | 5 |   |         |   |          |
| <i>Rhizobium leguminosarum</i> bv. trifolii WSM1325         | rlg  | 2 | 2 | 2 | 5 |   |         |   |          |
| <i>Rhizobium leguminosarum</i> bv. trifolii CB782           | rlu  | 2 | 2 | 2 | 4 |   |         |   |          |
| <i>Neorhizobium galegae</i> bv. <i>orientalis</i> HAMBI 540 | ngg  | 2 | 2 | 2 | 2 |   |         |   |          |

|                                           |      |   |   |   |    |   |             |   |            |
|-------------------------------------------|------|---|---|---|----|---|-------------|---|------------|
| <i>Bosea</i> sp. RAC05                    | bos  | 2 | 2 | 2 | 3  |   |             |   |            |
| <i>Bosea vaviloviae</i>                   | bvv  | 2 | 2 | 2 | 6  | 1 | T1PKS       | 1 | CYP1101A30 |
| <i>Azorhizobium caulinodans</i>           | azc  | 2 | 2 | 2 | 6  |   |             |   |            |
| <i>Beijerinckia indica</i>                | bid  | 2 | 2 | 2 | 10 | 1 | NRPS,T1PKS  | 1 | CYP173J1   |
| <i>Methylocella silvestris</i>            | msl  | 2 | 2 | 2 | 12 |   |             |   |            |
| <i>Hyphomicrobium nitrativorans</i>       | hni  | 2 | 2 | 2 | 4  |   |             |   |            |
| <i>Methylocystis</i> sp. SC2              | msc  | 2 | 2 | 2 | 13 |   |             |   |            |
| <i>Methyloceanibacter caenitepidi</i>     | mcg  | 2 | 2 | 2 | 6  |   |             |   |            |
| <i>Rhodobacter sphaeroides</i> 2.4.1      | rsp  | 2 | 2 | 2 | 5  |   |             |   |            |
| <i>Rhodobacter sphaeroides</i> ATCC 17029 | rsh  | 2 | 2 | 2 | 6  |   |             |   |            |
| <i>Rhodobacter sphaeroides</i> ATCC 17025 | rsq  | 2 | 2 | 2 | 5  | 1 | hserlactone | 1 | CYP152C2   |
| <i>Paracoccus denitrificans</i>           | pde  | 2 | 2 | 2 | 7  |   |             |   |            |
| <i>Paracoccus aminophilus</i>             | pami | 2 | 2 | 2 | 7  |   |             |   |            |
| <i>Dinoroseobacter shibae</i>             | dsh  | 2 | 2 | 2 |    |   |             |   |            |
| <i>Ketogulonicigenium robustum</i>        | kro  | 2 | 2 | 2 | 3  |   |             |   |            |
| <i>Octadecabacter arcticus</i>            | oar  | 2 | 2 | 2 | 5  |   |             |   |            |
| <i>Octadecabacter temperatus</i>          | otm  | 2 | 2 | 2 | 2  |   |             |   |            |
| <i>Roseibacterium elongatum</i>           | red  | 2 | 2 | 2 | 7  |   |             |   |            |



|                                                        |      |   |   |   |   |  |  |  |  |
|--------------------------------------------------------|------|---|---|---|---|--|--|--|--|
| <i>Celeribacter marinus</i>                            | cmar | 2 | 2 | 2 | 2 |  |  |  |  |
| <i>Rhodovulum</i> sp. P5                               | rhc  | 2 | 2 | 2 | 7 |  |  |  |  |
| <i>Labrenzia aggregata</i>                             | lagg | 2 | 2 | 2 | 7 |  |  |  |  |
| <i>Tateyamaria omphalii</i>                            | tom  | 2 | 2 | 2 | 5 |  |  |  |  |
| <i>Thioclava nitratreducens</i>                        | thw  | 2 | 2 | 2 | 5 |  |  |  |  |
| <i>Roseovarius mucosus</i>                             | rmm  | 2 | 2 | 2 | 8 |  |  |  |  |
| <i>Yoonia vestfoldensis</i>                            | lvs  | 2 | 2 | 2 | 5 |  |  |  |  |
| <i>Maricaulis maris</i>                                | mmr  | 2 | 2 | 2 | 1 |  |  |  |  |
| <i>Sphingobium</i> sp. EP60837 Chromosome 1            | sphb | 2 | 2 | 2 | 3 |  |  |  |  |
| <i>Altererythrobacter marensis</i>                     | amx  | 2 | 2 | 2 | 2 |  |  |  |  |
| <i>Altererythrobacter dongtanensis</i>                 | ado  | 2 | 2 | 2 | 4 |  |  |  |  |
| <i>Porphyrobacter neustonensis</i>                     | pns  | 2 | 2 | 2 | 2 |  |  |  |  |
| <i>Gluconacetobacter diazotrophicus</i> PA1 5 (Brazil) | gdi  | 2 | 2 | 2 | 5 |  |  |  |  |
| <i>Gluconacetobacter diazotrophicus</i> PA1 5 (JGI)    | gdj  | 2 | 2 | 2 | 4 |  |  |  |  |
| <i>Azospirillum brasilense</i> Sp245                   | abs  | 2 | 2 | 2 | 4 |  |  |  |  |
| <i>Magnetospira</i> sp. QH-2                           | magq | 2 | 2 | 2 |   |  |  |  |  |
| <i>Sphingobium baderi</i>                              | sbd  | 2 | 2 | 2 |   |  |  |  |  |
| <i>Aminobacter aminovorans</i>                         | aak  | 1 | 1 | 1 | 5 |  |  |  |  |
| <i>Agrobacterium tumefaciens</i> S33                   | ata  | 1 | 1 | 1 | 3 |  |  |  |  |

|                                        |      |   |   |   |   |  |  |  |  |
|----------------------------------------|------|---|---|---|---|--|--|--|--|
| <i>Rhizobium favelukesii</i>           | rhl  | 1 | 1 | 1 | 3 |  |  |  |  |
| <i>Liberibacter crescens</i>           | lcc  | 1 | 1 | 1 |   |  |  |  |  |
| <i>Shinella</i> sp. HZN7               | shz  | 1 | 1 | 1 | 2 |  |  |  |  |
| <i>Brucella melitensis</i> bv. 1 16M   | bme  | 1 | 1 | 1 | 4 |  |  |  |  |
| <i>Brucella melitensis</i> bv. 1 16M   | bmel | 1 | 1 | 1 | 4 |  |  |  |  |
| <i>Brucella melitensis</i> ATCC 23457  | bmi  | 1 | 1 | 1 | 3 |  |  |  |  |
| <i>Brucella melitensis</i> M28         | bmz  | 1 | 1 | 1 | 4 |  |  |  |  |
| <i>Brucella melitensis</i> M5-90       | bmj  | 1 | 1 | 1 | 3 |  |  |  |  |
| <i>Brucella melitensis</i> NI          | bmw  | 1 | 1 | 1 | 4 |  |  |  |  |
| <i>Brucella melitensis</i> bv. 3 Ether | bmee | 1 | 1 | 1 | 3 |  |  |  |  |
| <i>Brucella abortus</i> 2308           | bmf  | 1 | 1 | 1 | 4 |  |  |  |  |
| <i>Brucella abortus</i> S19            | bmc  | 1 | 1 | 1 | 5 |  |  |  |  |
| <i>Brucella abortus</i> A13334         | baa  | 1 | 1 | 1 | 5 |  |  |  |  |
| <i>Brucella abortus</i> bv. 2 86/8/59  | babo | 1 | 1 | 1 | 5 |  |  |  |  |
| <i>Brucella abortus</i> bv. 6 870      | babr | 1 | 1 | 1 | 5 |  |  |  |  |
| <i>Brucella abortus</i> 63 75          | babt | 1 | 1 | 1 | 6 |  |  |  |  |
| <i>Brucella abortus</i> BDW            | babb | 1 | 1 | 1 | 5 |  |  |  |  |
| <i>Brucella abortus</i> bv. 9 C68      | babu | 1 | 1 | 1 | 5 |  |  |  |  |
| <i>Brucella abortus</i> BER            | babs | 1 | 1 | 1 | 5 |  |  |  |  |

|                                         |      |   |   |   |   |  |  |  |  |
|-----------------------------------------|------|---|---|---|---|--|--|--|--|
| <i>Brucella abortus</i> NCTC 10505      | babc | 1 | 1 | 1 | 5 |  |  |  |  |
| <i>Brucella suis</i> bv. 2 Bs143CITA    | bsui | 1 | 1 | 1 | 5 |  |  |  |  |
| <i>Brucella suis</i> bv. 2 PT09143      | bsup | 1 | 1 | 1 | 5 |  |  |  |  |
| <i>Brucella suis</i> bv. 2 PT09172      | bsuv | 1 | 1 | 1 | 5 |  |  |  |  |
| <i>Brucella suis</i> bv. 2 Bs364CITA    | bsuc | 1 | 1 | 1 | 5 |  |  |  |  |
| <i>Brucella suis</i> bv. 3              | bsz  | 1 | 1 | 1 | 5 |  |  |  |  |
| <i>Brucella suis</i> ZW043              | bsw  | 1 | 1 | 1 | 6 |  |  |  |  |
| <i>Brucella suis</i> ZW046              | bsg  | 1 | 1 | 1 | 6 |  |  |  |  |
| <i>Brucella canis</i> ATCC 23365        | bcs  | 1 | 1 | 1 | 4 |  |  |  |  |
| <i>Brucella canis</i> HSK A52141        | bsk  | 1 | 1 | 1 | 5 |  |  |  |  |
| <i>Brucella canis</i> RM6/66            | bcar | 1 | 1 | 1 | 5 |  |  |  |  |
| <i>Brucella canis</i> SVA13             | bcas | 1 | 1 | 1 | 5 |  |  |  |  |
| <i>Brucella pinnipedialis</i> 6/566     | bpv  | 1 | 1 | 1 | 5 |  |  |  |  |
| <i>Brucella ceti</i> TE10759-12         | bcet | 1 | 1 | 1 | 5 |  |  |  |  |
| <i>Ochrobactrum anthropi</i> ATCC 49188 | oan  | 1 | 1 | 1 | 7 |  |  |  |  |
| <i>Ochrobactrum anthropi</i> OAB        | oah  | 1 | 1 | 1 | 7 |  |  |  |  |
| <i>Ochrobactrum pseudogrignonense</i>   | ops  | 1 | 1 | 1 | 6 |  |  |  |  |
| <i>Nitrobacter winogradskyi</i>         | nwi  | 1 | 1 | 1 | 4 |  |  |  |  |
| <i>Nitrobacter hamburgensis</i>         | nha  | 1 | 1 | 1 | 3 |  |  |  |  |

|                                           |      |   |   |   |   |   |       |   |           |
|-------------------------------------------|------|---|---|---|---|---|-------|---|-----------|
| <i>Xanthobacter autotrophicus</i>         | xau  | 1 | 1 | 1 | 9 | 1 | T1PKS | 1 | CYP1138B1 |
| <i>Pelagibacterium halotolerans</i>       | phl  | 1 | 1 | 1 | 4 |   |       |   |           |
| <i>Devosia</i> sp. H5989                  | deq  | 1 | 1 | 1 | 2 |   |       |   |           |
| <i>Methylocystis bryophila</i>            | mbry | 1 | 1 | 1 | 9 |   |       |   |           |
| <i>Martelella endophytica</i>             | mey  | 1 | 1 | 1 | 4 |   |       |   |           |
| <i>Pseudorhodoplanes sinuspersici</i>     | psin | 1 | 1 | 1 | 9 | 1 | T1PKS | 1 | CYP1104E2 |
| <i>Asticcacaulis excentricus</i>          | aex  | 1 | 1 | 1 | 5 |   |       |   |           |
| <i>Rhodobacter sphaeroides</i> KD131      | rsk  | 1 | 1 | 1 | 5 |   |       |   |           |
| <i>Ketogulonicigenium vulgare</i> Y25     | kvu  | 1 | 1 | 1 | 3 |   |       |   |           |
| <i>Ketogulonicigenium vulgare</i> WSH-001 | kvl  | 1 | 1 | 1 | 3 |   |       |   |           |
| <i>Rhodovulum sulfidophilum</i>           | rsu  | 1 | 1 | 1 |   |   |       |   |           |
| <i>Pannonibacter phragmitetus</i>         | pphr | 1 | 1 | 1 | 9 |   |       |   |           |
| <i>Yangia</i> sp. CCB-MM3                 | yan  | 1 | 1 | 1 | 5 |   |       |   |           |
| <i>Sphingopyxis terrae</i>                | ster | 1 | 1 | 1 | 6 |   |       |   |           |
| <i>Sphingopyxis</i> sp. LPB0140           | sphl | 1 | 1 | 1 | 2 |   |       |   |           |
| <i>Sphingomonas</i> sp. WHSC-8            | sphi | 1 | 1 | 1 |   |   |       |   |           |
| <i>Sphingobium</i> sp. SYK-6              | ssy  | 1 | 1 | 1 | 7 |   |       |   |           |
| <i>Sphingobium indicum</i>                | sinb | 1 | 1 | 1 | 2 |   |       |   |           |
| <i>Sphingorhabdus</i> sp. M41             | sphg | 1 | 1 | 1 | 3 |   |       |   |           |

|                                                                    |      |   |   |   |   |  |  |  |  |
|--------------------------------------------------------------------|------|---|---|---|---|--|--|--|--|
| <i>Altererythrobacter namhicola</i>                                | anh  | 1 | 1 | 1 | 2 |  |  |  |  |
| <i>Croceicoccus naphthovorans</i>                                  | cna  | 1 | 1 | 1 |   |  |  |  |  |
| <i>Acetobacter aceti</i>                                           | aace | 1 | 1 |   | 2 |  |  |  |  |
| <i>Magnetospirillum gryphiswaldense</i> MSR-1 v2                   | mggy | 1 | 1 | 1 |   |  |  |  |  |
| <i>Azospirillum brasilense</i> Az39                                | abq  | 1 | 1 | 1 | 3 |  |  |  |  |
| <i>Candidatus Puniceispirillum marinum</i>                         | apb  | 1 | 1 | 1 | 2 |  |  |  |  |
| <i>Rickettsiales bacterium</i> Ac37b                               | rbt  |   |   |   | 1 |  |  |  |  |
| <i>Rickettsiales</i> endosymbiont of <i>Stachyamoeba lipophora</i> | ren  |   |   |   | 1 |  |  |  |  |
| <i>Candidatus Paracaedibacter acanthamoebae</i>                    | paca |   |   |   | 2 |  |  |  |  |
| <i>Candidatus Paracaedimonas acanthamoebae</i>                     | caq  |   |   |   | 1 |  |  |  |  |
| <i>Candidatus Nucleicultrix amoebiphila</i>                        | naf  |   |   |   | 2 |  |  |  |  |
| Endosymbiont of <i>Acanthamoeba</i> sp. UWC8                       | eaa  |   |   |   | 1 |  |  |  |  |
| <i>Mesorhizobium</i> sp. WSM1497                                   | mesw |   |   |   | 7 |  |  |  |  |
| <i>Aminobacter</i> sp. MSH1                                        | amih |   |   |   | 5 |  |  |  |  |
| <i>Phyllobacterium zundukense</i>                                  | pht  |   |   |   | 2 |  |  |  |  |
| <i>Roseitalea porphyridii</i>                                      | rpod |   |   |   | 7 |  |  |  |  |
| <i>Rhodobiaceae bacterium</i> SMS8                                 | rbs  |   |   |   | 2 |  |  |  |  |
| <i>Sinorhizobium</i> sp. CCBAU 05631                               | sino |   |   |   | 7 |  |  |  |  |
| <i>Ensifer sojae</i>                                               | esj  |   |   |   | 5 |  |  |  |  |

|                                                 |     |  |  |  |   |  |  |  |  |
|-------------------------------------------------|-----|--|--|--|---|--|--|--|--|
| <i>Rhizobium</i> sp. S41                        | rhv |  |  |  | 1 |  |  |  |  |
| <i>Rhizobium</i> sp. Kim5                       | rhk |  |  |  | 4 |  |  |  |  |
| <i>Rhizobium esperanzae</i>                     | rez |  |  |  | 7 |  |  |  |  |
| <i>Neorhizobium</i> sp. SOG26                   | neo |  |  |  | 3 |  |  |  |  |
| <i>Neorhizobium</i> sp. NCHU2750                | nen |  |  |  | 3 |  |  |  |  |
| <i>Candidatus Liberibacter asiaticus</i> psy62  | las |  |  |  | 2 |  |  |  |  |
| <i>Candidatus Liberibacter asiaticus</i> gxpsy  | laa |  |  |  | 2 |  |  |  |  |
| <i>Candidatus Liberibacter asiaticus</i> Ishi-1 | lat |  |  |  | 2 |  |  |  |  |
| <i>Candidatus Liberibacter solanacearum</i>     | lso |  |  |  | 2 |  |  |  |  |
| <i>Candidatus Liberibacter americanus</i>       | lar |  |  |  | 2 |  |  |  |  |
| <i>Candidatus Liberibacter africanus</i>        | lau |  |  |  | 2 |  |  |  |  |
| <i>Brucella abortus</i> bv. 1 9-941             | bmb |  |  |  | 2 |  |  |  |  |
| <i>Brucella suis</i> 1330                       | bms |  |  |  | 2 |  |  |  |  |
| <i>Brucella suis</i> 1330                       | bsi |  |  |  | 2 |  |  |  |  |
| <i>Brucella suis</i> bv. 1                      | bsf |  |  |  | 2 |  |  |  |  |
| <i>Brucella suis</i> ATCC 23445                 | bmt |  |  |  | 2 |  |  |  |  |
| <i>Brucella suis</i> VBI22                      | bsv |  |  |  | 2 |  |  |  |  |
| <i>Brucella ovis</i>                            | bov |  |  |  | 3 |  |  |  |  |
| <i>Brucella canis</i> Oliveri                   | bol |  |  |  | 2 |  |  |  |  |

|                                                      |      |  |  |  |    |  |  |  |  |
|------------------------------------------------------|------|--|--|--|----|--|--|--|--|
| <i>Brucella microti</i>                              | bmr  |  |  |  | 3  |  |  |  |  |
| <i>Brucella pinnipedialis</i> B2/94                  | bpp  |  |  |  | 3  |  |  |  |  |
| <i>Brucella ceti</i> TE28753-12                      | bcee |  |  |  | 3  |  |  |  |  |
| <i>Brucella vulpis</i>                               | bvl  |  |  |  | 3  |  |  |  |  |
| <i>Brucella</i> sp. 2002734562                       | bru  |  |  |  | 2  |  |  |  |  |
| <i>Ochrobactrum</i> sp. A44                          | och  |  |  |  | 4  |  |  |  |  |
| <i>Bradyrhizobium</i> sp. ORS 285                    | bro  |  |  |  | 12 |  |  |  |  |
| <i>Bradyrhizobium</i> sp. SK17                       | brk  |  |  |  | 12 |  |  |  |  |
| <i>Bradyrhizobium ottawaense</i>                     | bot  |  |  |  | 7  |  |  |  |  |
| <i>Bradyrhizobium</i> sp. 2 39S1MB                   | brq  |  |  |  | 7  |  |  |  |  |
| <i>Oligotropha carboxidovorans</i> OM5 (Mississippi) | oca  |  |  |  | 4  |  |  |  |  |
| <i>Oligotropha carboxidovorans</i> OM5 (Goettingen)  | ocg  |  |  |  | 3  |  |  |  |  |
| <i>Oligotropha carboxidovorans</i> OM4               | oco  |  |  |  | 3  |  |  |  |  |
| <i>Bosea</i> sp. PAMC 26642                          | bop  |  |  |  | 2  |  |  |  |  |
| <i>Bosea</i> sp. Tri-49                              | boi  |  |  |  | 5  |  |  |  |  |
| <i>Variibacter gotjawalensis</i>                     | vgo  |  |  |  | 4  |  |  |  |  |
| <i>Bartonella henselae</i> Houston-1                 | bhe  |  |  |  | 1  |  |  |  |  |
| <i>Bartonella henselae</i> BM1374163                 | bhn  |  |  |  | 1  |  |  |  |  |
| <i>Bartonella henselae</i> BM1374165                 | bhs  |  |  |  | 1  |  |  |  |  |

|                                         |      |  |  |  |   |  |  |  |  |
|-----------------------------------------|------|--|--|--|---|--|--|--|--|
| <i>Bartonella quintana</i> Toulouse     | bqu  |  |  |  | 2 |  |  |  |  |
| <i>Bartonella quintana</i> RM-11        | bqr  |  |  |  | 2 |  |  |  |  |
| <i>Bartonella bacilliformis</i>         | bbk  |  |  |  | 1 |  |  |  |  |
| <i>Bartonella tribocorum</i> CIP 105476 | btr  |  |  |  | 2 |  |  |  |  |
| <i>Bartonella tribocorum</i> BM1374166  | btx  |  |  |  | 2 |  |  |  |  |
| <i>Bartonella grahamii</i>              | bgr  |  |  |  | 2 |  |  |  |  |
| <i>Bartonella clarridgeiae</i>          | bcd  |  |  |  | 2 |  |  |  |  |
| <i>Bartonella australis</i>             | baus |  |  |  | 2 |  |  |  |  |
| <i>Bartonella vinsonii</i>              | bvn  |  |  |  | 2 |  |  |  |  |
| <i>Bartonella ancashensis</i>           | banc |  |  |  | 2 |  |  |  |  |
| <i>Bartonella apis</i>                  | bapi |  |  |  | 2 |  |  |  |  |
| <i>Bartonella</i> sp. JB15              | bart |  |  |  | 1 |  |  |  |  |
| <i>Bartonella</i> sp. A1379B            | bara |  |  |  | 2 |  |  |  |  |
| <i>Bartonella</i> sp. WD16.2            | barw |  |  |  | 1 |  |  |  |  |
| <i>Bartonella</i> sp. Raccoon60         | barr |  |  |  | 2 |  |  |  |  |
| <i>Bartonella</i> sp. 1-1C              | baro |  |  |  | 2 |  |  |  |  |
| <i>Bartonella</i> sp. JB63              | barj |  |  |  | 1 |  |  |  |  |
| <i>Starkeya novella</i>                 | sno  |  |  |  | 4 |  |  |  |  |
| <i>Methylobacterium zatmanii</i>        | mza  |  |  |  | 7 |  |  |  |  |



|                                        |      |  |  |  |    |  |  |  |  |
|----------------------------------------|------|--|--|--|----|--|--|--|--|
| <i>Methylobacterium phyllosphaerae</i> | mphy |  |  |  | 10 |  |  |  |  |
| <i>Methylobacterium currus</i>         | mee  |  |  |  | 7  |  |  |  |  |
| <i>Methylobacterium</i> sp. DM1        | metd |  |  |  | 8  |  |  |  |  |
| <i>Methylobacterium</i> sp. XJLW       | metx |  |  |  | 9  |  |  |  |  |
| <i>Methylobacterium</i> sp. 17SD2-17   | mets |  |  |  | 6  |  |  |  |  |
| <i>Microvirga ossetica</i>             | moc  |  |  |  | 4  |  |  |  |  |
| <i>Microvirga</i> sp. 17 mud 1-3       | miv  |  |  |  | 7  |  |  |  |  |
| <i>Methylovirgula ligni</i>            | mlg  |  |  |  | 6  |  |  |  |  |
| <i>Chelatococcus</i> sp. CO-6          | chel |  |  |  | 6  |  |  |  |  |
| <i>Chelatococcus daeguensis</i>        | cdq  |  |  |  | 5  |  |  |  |  |
| <i>Rhodomicrobium vannielii</i>        | rva  |  |  |  | 7  |  |  |  |  |
| <i>Devosia</i> sp. I507                | dei  |  |  |  | 6  |  |  |  |  |
| <i>Blastochloris viridis</i>           | bvr  |  |  |  | 6  |  |  |  |  |
| <i>Blastochloris</i> sp. GI            | blag |  |  |  | 3  |  |  |  |  |
| <i>Maritalea myrionectae</i>           | mmyr |  |  |  | 4  |  |  |  |  |
| <i>Methylocystis rosea</i>             | mros |  |  |  | 14 |  |  |  |  |
| <i>Methylosinus trichosporium</i>      | mtw  |  |  |  | 9  |  |  |  |  |
| <i>Pleomorphomonas</i> sp. SM30        | pleo |  |  |  | 4  |  |  |  |  |
| <i>Martelella</i> sp. AD-3             | maad |  |  |  | 5  |  |  |  |  |

|                                              |      |  |  |  |   |  |  |  |  |
|----------------------------------------------|------|--|--|--|---|--|--|--|--|
| <i>Martelella mediterranea</i>               | mmed |  |  |  | 5 |  |  |  |  |
| <i>Aureimonas</i> sp. AU20                   | aua  |  |  |  | 4 |  |  |  |  |
| <i>Breoghanian</i> sp. L-A4                  | brn  |  |  |  | 7 |  |  |  |  |
| <i>Candidatus Tokpelaia hoelldoblerii</i>    | thd  |  |  |  | 3 |  |  |  |  |
| <i>Hartmannibacter diazotrophicus</i>        | hdi  |  |  |  | 8 |  |  |  |  |
| <i>Rhizobiales bacterium</i> NRL2            | rbm  |  |  |  | 8 |  |  |  |  |
| <i>Caulobacter henricii</i>                  | chq  |  |  |  | 4 |  |  |  |  |
| <i>Caulobacter mirabilis</i>                 | cmb  |  |  |  | 5 |  |  |  |  |
| <i>Caulobacter flavus</i>                    | cfh  |  |  |  | 5 |  |  |  |  |
| <i>Phenyllobacterium</i> sp. HYN0004         | phb  |  |  |  | 1 |  |  |  |  |
| <i>Brevundimonas subvibrioides</i>           | bsb  |  |  |  | 3 |  |  |  |  |
| <i>Brevundimonas</i> sp. DS20                | brd  |  |  |  | 5 |  |  |  |  |
| <i>Brevundimonas naejangsanensis</i>         | bne  |  |  |  | 3 |  |  |  |  |
| <i>Brevundimonas</i> sp. GW460-12-10-14-LB2  | brg  |  |  |  | 2 |  |  |  |  |
| <i>Brevundimonas</i> sp. LM2                 | brl  |  |  |  | 5 |  |  |  |  |
| <i>Brevundimonas vesicularis</i>             | bvc  |  |  |  | 2 |  |  |  |  |
| <i>Brevundimonas diminuta</i>                | bdm  |  |  |  | 7 |  |  |  |  |
| <i>Caulobacteraceae bacterium</i> OTSz_A_272 | cbot |  |  |  | 3 |  |  |  |  |
| <i>Ruegeria</i> sp. AD91A                    | rua  |  |  |  | 7 |  |  |  |  |

|                                   |      |  |  |  |   |  |  |  |  |
|-----------------------------------|------|--|--|--|---|--|--|--|--|
| <i>Epibacterium mobile</i>        | rmb  |  |  |  | 5 |  |  |  |  |
| <i>Rhodobacter</i> sp. LPB0142    | rhp  |  |  |  | 4 |  |  |  |  |
| <i>Rhodobacter blasticus</i>      | rbl  |  |  |  | 3 |  |  |  |  |
| <i>Paracoccus contaminans</i>     | pcon |  |  |  | 3 |  |  |  |  |
| <i>Paracoccus zhejiangensis</i>   | pzh  |  |  |  | 6 |  |  |  |  |
| <i>Paracoccus</i> sp. BM15        | paro |  |  |  | 8 |  |  |  |  |
| <i>Paracoccus</i> sp. CBA4604     | paru |  |  |  | 4 |  |  |  |  |
| <i>Paracoccus aminovorans</i>     | pamn |  |  |  | 5 |  |  |  |  |
| <i>Paracoccus mutanolyticus</i>   | pmut |  |  |  | 2 |  |  |  |  |
| <i>Paracoccus</i> sp. SC2-6       | pars |  |  |  | 3 |  |  |  |  |
| <i>Phaeobacter piscinae</i>       | ppic |  |  |  | 5 |  |  |  |  |
| <i>Phaeobacter</i> sp. LSS9       | phq  |  |  |  | 7 |  |  |  |  |
| <i>Octadecabacter antarcticus</i> | oat  |  |  |  | 8 |  |  |  |  |
| <i>Leisingera</i> sp. NJS204      | lej  |  |  |  | 8 |  |  |  |  |
| <i>Celeribacter ethanolicus</i>   | ceh  |  |  |  | 4 |  |  |  |  |
| <i>Celeribacter manganoxidans</i> | cmag |  |  |  | 3 |  |  |  |  |
| <i>Rhodovulum</i> sp. MB263       | rhm  |  |  |  | 5 |  |  |  |  |
| <i>Halocynthiibacter arcticus</i> | hat  |  |  |  | 5 |  |  |  |  |
| <i>Labrenzia</i> sp. VG12         | labr |  |  |  | 6 |  |  |  |  |

|                                                    |      |  |  |  |   |  |  |  |  |
|----------------------------------------------------|------|--|--|--|---|--|--|--|--|
| <i>Yangia pacifica</i>                             | ypac |  |  |  | 3 |  |  |  |  |
| <i>Sulfitobacter pseudonitzschiae</i>              | spse |  |  |  | 9 |  |  |  |  |
| <i>Sulfitobacter</i> sp. SK012                     | sulz |  |  |  | 8 |  |  |  |  |
| <i>Sulfitobacter</i> sp. JL08                      | suli |  |  |  | 5 |  |  |  |  |
| <i>Sulfitobacter</i> sp. D7                        | suld |  |  |  | 5 |  |  |  |  |
| <i>Donghicola</i> sp. JLT3646                      | don  |  |  |  | 5 |  |  |  |  |
| <i>Roseovarius</i> sp. AK1035                      | rok  |  |  |  | 8 |  |  |  |  |
| <i>Antarctobacter heliothermus</i>                 | aht  |  |  |  | 9 |  |  |  |  |
| <i>Rhodobaca barguzinensis</i>                     | rbg  |  |  |  | 3 |  |  |  |  |
| <i>Sagittula</i> sp. P11                           | sagu |  |  |  | 3 |  |  |  |  |
| <i>Thalassococcus</i> sp. SH-1                     | thas |  |  |  | 3 |  |  |  |  |
| <i>Thalassococcus</i> sp. S3                       | thaa |  |  |  | 9 |  |  |  |  |
| <i>Gemmobacter</i> sp. HYN0069                     | geh  |  |  |  | 6 |  |  |  |  |
| <i>Tabrizicola</i> sp. K13M18                      | taw  |  |  |  | 5 |  |  |  |  |
| <i>Silicimonas algicola</i>                        | salo |  |  |  | 6 |  |  |  |  |
| <i>Sedimentitalea</i> sp. W43                      | sedi |  |  |  | 5 |  |  |  |  |
| <i>Haematobacter massiliensis</i>                  | hml  |  |  |  | 3 |  |  |  |  |
| <i>Rhodobacteraceae bacterium</i> G7               | rbz  |  |  |  | 5 |  |  |  |  |
| <i>Zymomonas mobilis</i> subsp. <i>mobilis</i> ZM4 | zmo  |  |  |  | 2 |  |  |  |  |

|                                                                   |      |  |  |  |   |  |  |  |  |
|-------------------------------------------------------------------|------|--|--|--|---|--|--|--|--|
| <i>Zymomonas mobilis</i> subsp. <i>mobilis</i> NCIMB 11163        | zmn  |  |  |  | 2 |  |  |  |  |
| <i>Zymomonas mobilis</i> subsp. <i>mobilis</i> ATCC 10988         | zmm  |  |  |  | 2 |  |  |  |  |
| <i>Zymomonas mobilis</i> subsp. <i>mobilis</i> ATCC 29191         | zmb  |  |  |  | 2 |  |  |  |  |
| <i>Zymomonas mobilis</i> subsp. <i>mobilis</i> CP4 = NRRL B-14023 | zmi  |  |  |  | 2 |  |  |  |  |
| <i>Zymomonas mobilis</i> subsp. <i>mobilis</i> CP4 = NRRL B-14023 | zmc  |  |  |  | 2 |  |  |  |  |
| <i>Zymomonas mobilis</i> subsp. <i>mobilis</i> NRRL B-12526       | zmr  |  |  |  | 2 |  |  |  |  |
| <i>Zymomonas mobilis</i> subsp. <i>pomaceae</i> ATCC 29192        | zmp  |  |  |  | 1 |  |  |  |  |
| <i>Novosphingobium resinovorum</i>                                | nre  |  |  |  | 4 |  |  |  |  |
| <i>Novosphingobium</i> sp. P6W                                    | nov  |  |  |  | 4 |  |  |  |  |
| <i>Novosphingobium</i> sp. THN1                                   | not  |  |  |  | 2 |  |  |  |  |
| <i>Novosphingobium tardaugens</i>                                 | ntd  |  |  |  | 1 |  |  |  |  |
| <i>Sphingopyxis macrogoltabida</i> EY-1                           | smag |  |  |  | 8 |  |  |  |  |
| <i>Sphingopyxis</i> sp. QXT-31                                    | sphq |  |  |  | 8 |  |  |  |  |
| <i>Sphingopyxis</i> sp. MG                                        | spho |  |  |  | 4 |  |  |  |  |
| Uncultured <i>Sphingopyxis</i> sp. UC10                           | sphu |  |  |  | 6 |  |  |  |  |
| <i>Sphingomonas wittichii</i> DC-6                                | sphd |  |  |  | 6 |  |  |  |  |
| <i>Sphingomonas taxi</i>                                          | stax |  |  |  | 3 |  |  |  |  |
| <i>Sphingomonas sanxanigenens</i>                                 | ssan |  |  |  | 5 |  |  |  |  |
| <i>Sphingomonas</i> sp. NIC1                                      | snj  |  |  |  | 3 |  |  |  |  |

|                                   |      |  |  |  |    |  |  |  |  |
|-----------------------------------|------|--|--|--|----|--|--|--|--|
| <i>Sphingomonas melonis</i>       | smy  |  |  |  | 5  |  |  |  |  |
| <i>Sphingomonas panacis</i>       | span |  |  |  | 4  |  |  |  |  |
| <i>Sphingomonas koreensis</i>     | skr  |  |  |  | 6  |  |  |  |  |
| <i>Sphingomonas</i> sp. LM7       | splm |  |  |  | 1  |  |  |  |  |
| <i>Sphingomonas</i> sp. LK11      | splk |  |  |  | 3  |  |  |  |  |
| <i>Sphingomonas</i> sp. JJ-A5     | sphj |  |  |  | 4  |  |  |  |  |
| <i>Sphingomonas</i> sp. KC8       | spkc |  |  |  | 5  |  |  |  |  |
| <i>Sphingomonas</i> sp. Cra20     | sphc |  |  |  | 3  |  |  |  |  |
| <i>Sphingomonas</i> sp. FARSPH    | sphf |  |  |  | 4  |  |  |  |  |
| <i>Sphingomonas</i> sp. YZ-8      | spha |  |  |  | 4  |  |  |  |  |
| <i>Sphingobium</i> sp. TKS        | spht |  |  |  | 4  |  |  |  |  |
| <i>Sphingobium hydrophobicum</i>  | shyd |  |  |  | 4  |  |  |  |  |
| <i>Sphingobium yanoikuyae</i>     | sya  |  |  |  | 10 |  |  |  |  |
| <i>Sphingobium cloacae</i>        | sclo |  |  |  | 1  |  |  |  |  |
| <i>Sphingobium</i> sp. YG1        | spyg |  |  |  | 4  |  |  |  |  |
| <i>Sphingorhabdus flavimaris</i>  | sfla |  |  |  | 5  |  |  |  |  |
| <i>Sphingorhabdus</i> sp. YGSMI21 | sphy |  |  |  | 4  |  |  |  |  |
| <i>Blastomonas fulva</i>          | bfw  |  |  |  | 5  |  |  |  |  |
| <i>Rhizorhabdus dicambivorans</i> | rdi  |  |  |  | 7  |  |  |  |  |

|                                            |      |  |  |  |   |  |  |  |  |
|--------------------------------------------|------|--|--|--|---|--|--|--|--|
| <i>Sphingosinicella microcystinivorans</i> | smic |  |  |  | 9 |  |  |  |  |
| <i>Sphingosinicella</i> sp. BN140058       | sphs |  |  |  | 6 |  |  |  |  |
| <i>Erythrobacter</i> sp. s21-N3            | ery  |  |  |  | 4 |  |  |  |  |
| <i>Erythrobacter gangjinensis</i>          | egn  |  |  |  | 3 |  |  |  |  |
| <i>Erythrobacter flavus</i>                | efv  |  |  |  | 2 |  |  |  |  |
| <i>Erythrobacter</i> sp. KY5               | erk  |  |  |  | 3 |  |  |  |  |
| <i>Erythrobacter</i> sp. YH-07             | err  |  |  |  | 4 |  |  |  |  |
| <i>Altererythrobacter</i> sp. B11          | alb  |  |  |  | 4 |  |  |  |  |
| <i>Croceicoccus marinus</i>                | cman |  |  |  | 4 |  |  |  |  |
| <i>Porphyrobacter</i> sp. HT-58-2          | phz  |  |  |  | 2 |  |  |  |  |
| <i>Gluconobacter oxydans</i> 621H          | gox  |  |  |  | 2 |  |  |  |  |
| <i>Gluconobacter oxydans</i> H24           | goh  |  |  |  | 4 |  |  |  |  |
| <i>Gluconobacter oxydans</i> DSM 3504      | goy  |  |  |  | 1 |  |  |  |  |
| <i>Gluconobacter albidus</i>               | gal  |  |  |  | 1 |  |  |  |  |
| <i>Granulibacter bethesdensis</i> CGDNIH1  | gbe  |  |  |  | 6 |  |  |  |  |
| <i>Granulibacter bethesdensis</i> CGDNIH2  | gbh  |  |  |  | 6 |  |  |  |  |
| <i>Granulibacter bethesdensis</i> CGDNIH3  | gbc  |  |  |  | 6 |  |  |  |  |
| <i>Granulibacter bethesdensis</i> CGDNIH4  | gbs  |  |  |  | 6 |  |  |  |  |
| <i>Acidiphilium cryptum</i>                | acr  |  |  |  | 4 |  |  |  |  |

|                                                 |      |  |  |  |   |  |  |  |  |
|-------------------------------------------------|------|--|--|--|---|--|--|--|--|
| <i>Acidiphilium multivorum</i>                  | amv  |  |  |  | 6 |  |  |  |  |
| <i>Komagataeibacter medellinensis</i>           | gxy  |  |  |  | 3 |  |  |  |  |
| <i>Komagataeibacter xylinus</i>                 | gxl  |  |  |  | 3 |  |  |  |  |
| <i>Komagataeibacter nataicola</i>               | kna  |  |  |  | 6 |  |  |  |  |
| <i>Komagataeibacter europaeus</i>               | keu  |  |  |  | 6 |  |  |  |  |
| <i>Komagataeibacter saccharivorans</i>          | ksc  |  |  |  | 4 |  |  |  |  |
| <i>Acetobacter pasteurianus</i> IFO 3283-01     | apt  |  |  |  | 3 |  |  |  |  |
| <i>Acetobacter pasteurianus</i> IFO 3283-01-42C | apw  |  |  |  | 3 |  |  |  |  |
| <i>Acetobacter pasteurianus</i> IFO 3283-03     | apf  |  |  |  | 3 |  |  |  |  |
| <i>Acetobacter pasteurianus</i> IFO 3283-07     | apu  |  |  |  | 3 |  |  |  |  |
| <i>Acetobacter pasteurianus</i> IFO 3283-12     | apg  |  |  |  | 3 |  |  |  |  |
| <i>Acetobacter pasteurianus</i> IFO 3283-22     | apq  |  |  |  | 3 |  |  |  |  |
| <i>Acetobacter pasteurianus</i> IFO 3283-26     | apx  |  |  |  | 3 |  |  |  |  |
| <i>Acetobacter pasteurianus</i> IFO 3283-32     | apz  |  |  |  | 3 |  |  |  |  |
| <i>Acetobacter pasteurianus</i> 386B            | apk  |  |  |  | 3 |  |  |  |  |
| <i>Acetobacter senegalensis</i>                 | asz  |  |  |  | 4 |  |  |  |  |
| <i>Acetobacter oryzifermentans</i>              | asv  |  |  |  | 4 |  |  |  |  |
| <i>Acetobacter persici</i>                      | aper |  |  |  | 7 |  |  |  |  |
| <i>Acetobacter pomorum</i>                      | apom |  |  |  | 4 |  |  |  |  |



|                                               |      |  |  |  |    |  |  |  |  |
|-----------------------------------------------|------|--|--|--|----|--|--|--|--|
| <i>Acetobacter tropicalis</i>                 | ato  |  |  |  | 4  |  |  |  |  |
| <i>Acetobacter ascendens</i>                  | aasc |  |  |  | 3  |  |  |  |  |
| <i>Acetobacter</i> sp. JWB                    | acet |  |  |  | 4  |  |  |  |  |
| <i>Asaia bogorensis</i>                       | abg  |  |  |  | 2  |  |  |  |  |
| <i>Kozakia baliensis</i>                      | kba  |  |  |  | 3  |  |  |  |  |
| <i>Roseomonas gilardii</i>                    | rgi  |  |  |  | 6  |  |  |  |  |
| <i>Roseomonas</i> sp. FDAARGOS_362            | ros  |  |  |  | 6  |  |  |  |  |
| <i>Neosaia chiangmaiensis</i>                 | nch  |  |  |  | 4  |  |  |  |  |
| <i>Commensalibacter</i> sp. AMU001            | coq  |  |  |  | 2  |  |  |  |  |
| <i>Rhodospirillum rubrum</i> ATCC 11170       | rru  |  |  |  | 9  |  |  |  |  |
| <i>Rhodospirillum rubrum</i> F11              | rrf  |  |  |  | 11 |  |  |  |  |
| <i>Rhodospirillum centenum</i>                | rce  |  |  |  | 5  |  |  |  |  |
| <i>Pararhodospirillum photometricum</i>       | rpm  |  |  |  | 3  |  |  |  |  |
| <i>Magnetospirillum magneticum</i>            | mag  |  |  |  | 4  |  |  |  |  |
| <i>Magnetospirillum gryphiswaldense</i> MSR-1 | mgry |  |  |  | 4  |  |  |  |  |
| <i>Magnetospirillum</i> sp. XM-1              | magx |  |  |  | 6  |  |  |  |  |
| <i>Magnetospirillum</i> sp. ME-1              | magn |  |  |  | 4  |  |  |  |  |
| <i>Azospirillum lipoferum</i>                 | ali  |  |  |  | 2  |  |  |  |  |
| <i>Azospirillum brasilense</i> Sp7            | abf  |  |  |  | 3  |  |  |  |  |

|                                                |      |  |  |  |   |  |  |  |  |
|------------------------------------------------|------|--|--|--|---|--|--|--|--|
| <i>Azospirillum thiophilum</i>                 | ati  |  |  |  | 2 |  |  |  |  |
| <i>Azospirillum humicireducens</i>             | ahu  |  |  |  | 2 |  |  |  |  |
| <i>Azospirillum</i> sp. TSH58                  | azt  |  |  |  | 2 |  |  |  |  |
| <i>Azospirillum</i> sp. M2T2B2                 | azm  |  |  |  | 2 |  |  |  |  |
| <i>Candidatus Endolissoclinum faulkneri</i> L2 | thal |  |  |  | 4 |  |  |  |  |
| <i>Candidatus Endolissoclinum faulkneri</i> L5 | efk  |  |  |  | 4 |  |  |  |  |
| <i>Thalassospira xiamenensis</i>               | txi  |  |  |  | 6 |  |  |  |  |
| <i>Thalassospira marina</i>                    | thac |  |  |  | 5 |  |  |  |  |
| <i>Thalassospira indica</i>                    | tii  |  |  |  | 5 |  |  |  |  |
| <i>Haematospirillum jordaniae</i>              | hjo  |  |  |  | 2 |  |  |  |  |
| <i>Nitrospirillum amazonense</i>               | nao  |  |  |  | 2 |  |  |  |  |
| <i>Niveispirillum cyanobacteriorum</i>         | ncb  |  |  |  | 3 |  |  |  |  |
| <i>Parvularcula bermudensis</i>                | pbr  |  |  |  | 4 |  |  |  |  |
| <i>Magnetococcus marinus</i>                   | mgm  |  |  |  | 2 |  |  |  |  |
| <i>Candidatus Pelagibacter ubique</i>          | pub  |  |  |  | 1 |  |  |  |  |
| <i>Candidatus Pelagibacter</i> sp. IMCC9063    | pel  |  |  |  | 1 |  |  |  |  |
| <i>Alpha proteobacterium</i> HIMB59            | apc  |  |  |  | 1 |  |  |  |  |
| <i>Alpha proteobacterium</i> HIMB5             | apm  |  |  |  | 1 |  |  |  |  |
| <i>Micavibrio aeruginosavorus</i> ARL-13       | mai  |  |  |  | 3 |  |  |  |  |

|                                           |      |  |  |  |   |  |  |  |  |
|-------------------------------------------|------|--|--|--|---|--|--|--|--|
| <i>Micavibrio aeruginosavorus</i> EPB     | man  |  |  |  | 2 |  |  |  |  |
| <i>Phreatobacter</i> sp. S-12             | phr  |  |  |  | 2 |  |  |  |  |
| <i>Alphaproteobacteria bacterium</i> WS11 | abaw |  |  |  | 5 |  |  |  |  |

Table S3: List of new P450 families identified in Alphaproteobacterial species.

|           |
|-----------|
| CYP1010A1 |
|-----------|

|           |
|-----------|
| CYP1017A1 |
| CYP103A1  |
| CYP104A1  |
| CYP1075A1 |
| CYP1076A1 |
| CYP1077A1 |
| CYP1078A1 |
| CYP112A1  |
| CYP1135A1 |
| CYP1137A1 |
| CYP1141A1 |
| CYP1145A1 |
| CYP1170A1 |
| CYP1171A1 |
| CYP1173A1 |
| CYP1174A1 |
| CYP1175A1 |
| CYP1181A1 |
| CYP1182A1 |
| CYP1186A1 |
| CYP1187A1 |
| CYP1258A1 |
| CYP127A1  |
| CYP1281A1 |
| CYP1302A1 |
| CYP1311A1 |
| CYP1312A1 |
| CYP1384A1 |
| CYP1396A1 |

|           |
|-----------|
| CYP1515A1 |
| CYP152AA1 |
| CYP1732A1 |
| CYP1733A1 |
| CYP1734A1 |
| CYP1735A1 |
| CYP1736A1 |
| CYP1737A1 |
| CYP1738A1 |
| CYP1739A1 |
| CYP173A1  |
| CYP1740A1 |
| CYP1741A1 |
| CYP1742A1 |
| CYP1743A1 |
| CYP1744A1 |
| CYP1745A1 |
| CYP1746A1 |
| CYP1747A1 |
| CYP1748A1 |
| CYP1749A1 |
| CYP1750A1 |
| CYP1751A1 |
| CYP1752A1 |
| CYP1753A1 |
| CYP1754A1 |
| CYP1755A1 |
| CYP192A1  |
| CYP193A1  |

|           |
|-----------|
| CYP194A1  |
| CYP195A1  |
| CYP196A1  |
| CYP199A1  |
| CYP200A1  |
| CYP201A1  |
| CYP202A1  |
| CYP203A1  |
| CYP204A1  |
| CYP206A1  |
| CYP2140A1 |
| CYP219A1  |
| CYP223A1  |
| CYP224A1  |
| CYP225A1  |
| CYP2334A1 |
| CYP289A1  |
| CYP290A1  |
